# Supplementary material for: Association Between Changes in Alcohol Consumption and Cancer Risk
Source: PubMed Central journal article supplement (PMC9403779; doi:10.1001/jamanetworkopen.2022.28544), 2022-08-24
Supplement: jamanetwopen-e2228544-s001.pdf [file jamanetwopen-e2228544-s001.pdf]

## Supplemental Online Content

Yoo JE, Han K, Shin DW, et al. Association between changes in alcohol consumption and cancer risk. *JAMA Netw Open*. 2022;5(8):e2228544.  
doi:10.1001/jamanetworkopen.2022.28544

**eTable 1.** Associations Between Changes in Drinking Level and Cancer Including Participants With Previous Cardiovascular History

**eTable 2.** The Risk of Site-Specific Cancer According to Changes in Drinking Level Between 2009 and 2011

**eTable 3.** Associations Between Changes in Drinking Level From 2009 to 2013 and Alcohol-Related Cancers

**eTable 4.** Associations Between Changes in Drinking Level From 2009 to 2013 and All Cancers

**eTable 5.** Adjusted Hazard Ratios and 95% Confidence Intervals for Cancer According to Changes in Drinking Level by Age

**eTable 6.** Adjusted Hazard Ratios and 95% Confidence Intervals for Cancer According to Changes in Drinking Level by Sex

**eTable 7.** Adjusted Hazard Ratios and 95% Confidence Intervals for Cancer According to Changes in Drinking Level by Smoking Status in 2009 (Male)

**eTable 8.** Adjusted Hazard Ratios and 95% Confidence Intervals for Cancer According to Changes in Drinking Level by Smoking Status in 2009 (Female)

**eTable 9.** Associations Between Changes in Drinking Level and Cancer (Sustained Non-Drinker as a Referent)

**eFigure 1.** Flow Chart of the Study Population

**eFigure 2.** The Risk of Site-Specific Cancer According to Changes in Drinking Level Between 2009 and 2011

This supplemental material has been provided by the authors to give readers additional information about their work.

**eTable 1.** Associations Between Changes in Drinking Level and Cancer Including Participants With Previous Cardiovascular History

| Alcohol consumption status          |          | Subjects (N) | Events (n) | Person-years | IR   | aHR (95% CI)*           |
|-------------------------------------|----------|--------------|------------|--------------|------|-------------------------|
| 2009                                | 2011     |              |            |              |      |                         |
| <b>Alcohol-related cancers</b>      |          |              |            |              |      |                         |
| None                                | None     | 2,258,335    | 40,732     | 14,220,119.5 | 2.9  | 1 (Ref.)                |
|                                     | Mild     | 300,068      | 5,046      | 1,889,920.3  | 2.7  | 1.03 (1.00–1.06)        |
|                                     | Moderate | 43,783       | 846        | 274,477.1    | 3.1  | <b>1.11 (1.03–1.19)</b> |
|                                     | Heavy    | 25,169       | 590        | 156,537.6    | 3.8  | <b>1.33 (1.22–1.44)</b> |
| Mild                                | None     | 309,925      | 5,559      | 1,948,075.8  | 2.9  | <b>0.96 (0.93–0.99)</b> |
|                                     | Mild     | 666,087      | 10,347     | 4,195,312.0  | 2.5  | 1 (Ref.)                |
|                                     | Moderate | 138,812      | 2,393      | 872,245.7    | 2.7  | <b>1.09 (1.05–1.14)</b> |
| Moderate                            | Heavy    | 42,271       | 875        | 264,233.9    | 3.3  | <b>1.17 (1.09–1.25)</b> |
|                                     | None     | 45,507       | 1,015      | 283,064.5    | 3.6  | 1.04 (0.97–1.12)        |
|                                     | Mild     | 161,854      | 2,856      | 1,015,160.5  | 2.8  | 0.98 (0.93–1.03)        |
|                                     | Moderate | 177,863      | 2,970      | 1,116,637.9  | 2.7  | 1 (Ref.)                |
| Heavy                               | Heavy    | 80,059       | 1,512      | 501,377.0    | 3.0  | 1.04 (0.97–1.10)        |
|                                     | None     | 28,375       | 811        | 174,053.8    | 4.7  | 1.02 (0.95–1.11)        |
|                                     | Mild     | 53,992       | 1,165      | 336,554.5    | 3.5  | <b>0.91 (0.85–0.97)</b> |
|                                     | Moderate | 89,022       | 1,757      | 556,166.9    | 3.2  | <b>0.91 (0.86–0.97)</b> |
|                                     | Heavy    | 150,971      | 3,428      | 941,527.4    | 3.6  | 1 (Ref.)                |
| <b>All cancers (except thyroid)</b> |          |              |            |              |      |                         |
| None                                | None     | 2,258,335    | 108,031    | 14,063,390.2 | 7.7  | 1 (Ref.)                |
|                                     | Mild     | 300,068      | 13,251     | 1,870,327.8  | 7.1  | 0.99 (0.97–1.00)        |
|                                     | Moderate | 43,783       | 2,356      | 270,848.9    | 8.7  | 0.99 (0.95–1.03)        |
|                                     | Heavy    | 25,169       | 1,642      | 154,197.0    | 10.6 | <b>1.11 (1.06–1.17)</b> |
| Mild                                | None     | 309,925      | 15,088     | 1,925,700.3  | 7.8  | 0.98 (0.96–1.00)        |
|                                     | Mild     | 666,087      | 28,991     | 4,150,056.0  | 7.0  | 1 (Ref.)                |
|                                     | Moderate | 138,812      | 6,616      | 862,319.3    | 7.7  | 1.02 (0.99–1.05)        |
| Moderate                            | Heavy    | 42,271       | 2,428      | 260,607.7    | 9.3  | <b>1.08 (1.04–1.13)</b> |
|                                     | None     | 45,507       | 2,970      | 278,591.3    | 10.7 | <b>1.07 (1.02–1.11)</b> |
|                                     | Mild     | 161,854      | 8,045      | 1,002,858.3  | 8.0  | 0.98 (0.95–1.01)        |
|                                     | Moderate | 177,863      | 8,305      | 1,104,090.9  | 7.5  | 1 (Ref.)                |
| Heavy                               | Heavy    | 80,059       | 4,153      | 495,461.6    | 8.4  | 1.01 (0.97–1.05)        |
|                                     | None     | 28,375       | 2,257      | 171,028.4    | 13.2 | <b>1.06 (1.01–1.11)</b> |
|                                     | Mild     | 53,992       | 3,190      | 331,896.5    | 9.6  | <b>0.92 (0.89–0.96)</b> |
|                                     | Moderate | 89,022       | 4,866      | 548,961.7    | 8.9  | <b>0.95 (0.92–0.99)</b> |
|                                     | Heavy    | 150,971      | 9,224      | 928,313.8    | 9.9  | 1 (Ref.)                |

IR, incidence rate per 1,000 person-years; aHR, adjusted hazard ratio; CI, confidence interval

\*adjusted for age, sex, socioeconomic position (income level and place of residence), smoking status, physical activity, comorbidities (hypertension, diabetes, dyslipidemia, chronic kidney disease, and chronic obstructive pulmonary disease), and Charlson comorbidity index

**eTable 2.** The Risk of Site-Specific Cancer According to Changes in Drinking Level Between 2009 and 2011

| 2011 \ 2009                                           | None                    | Mild                    | Moderate                | Heavy                   |
|-------------------------------------------------------|-------------------------|-------------------------|-------------------------|-------------------------|
| <b>Lip, oral cavity and pharynx (n=3884, IR=0.14)</b> |                         |                         |                         |                         |
| None                                                  | 1 (Ref.)                | 0.94 (0.80–1.11)        | 1.00 (0.74–1.35)        | 1.13 (0.83–1.55)        |
| Mild                                                  | <b>1.20 (1.04–1.38)</b> | 1 (Ref.)                | 0.98 (0.81–1.19)        | 1.11 (0.87–1.42)        |
| Moderate                                              | 1.21 (0.90–1.63)        | 1.15 (0.96–1.38)        | 1 (Ref.)                | 0.96 (0.77–1.20)        |
| Heavy                                                 | <b>1.47 (1.06–2.05)</b> | 1.22 (0.92–1.61)        | 0.93 (0.73–1.18)        | 1 (Ref.)                |
| <b>Esophagus (n=3,009, IR=0.11)</b>                   |                         |                         |                         |                         |
| None                                                  | 1 (Ref.)                | 0.92 (0.76–1.12)        | 1.07 (0.81–1.41)        | 1.01 (0.79–1.29)        |
| Mild                                                  | 1.13 (0.92–1.38)        | 1 (Ref.)                | <b>0.80 (0.66–0.98)</b> | <b>0.74 (0.59–0.92)</b> |
| Moderate                                              | <b>2.38 (1.79–3.17)</b> | <b>1.38 (1.13–1.70)</b> | 1 (Ref.)                | <b>0.73 (0.61–0.88)</b> |
| Heavy                                                 | <b>3.66 (2.77–4.83)</b> | <b>2.23 (1.74–2.86)</b> | 1.03 (0.83–1.29)        | 1 (Ref.)                |
| <b>Stomach (n=38,225, IR=1.34)</b>                    |                         |                         |                         |                         |
| None                                                  | 1 (Ref.)                | 0.97 (0.92–1.02)        | 1.09 (0.98–1.20)        | <b>1.12 (1.01–1.25)</b> |
| Mild                                                  | 0.98 (0.94–1.03)        | 1 (Ref.)                | 0.99 (0.92–1.06)        | 0.92 (0.84–1.01)        |
| Moderate                                              | 1.02 (0.93–1.13)        | 1.04 (0.98–1.11)        | 1 (Ref.)                | 0.96 (0.89–1.04)        |
| Heavy                                                 | <b>1.16 (1.04–1.30)</b> | <b>1.16 (1.06–1.27)</b> | 0.97 (0.90–1.06)        | 1 (Ref.)                |
| <b>Colorectum (n=41,102, IR=1.44)</b>                 |                         |                         |                         |                         |
| None                                                  | 1 (Ref.)                | 0.96 (0.92–1.01)        | 1.01 (0.92–1.12)        | 1.02 (0.92–1.14)        |
| Mild                                                  | <b>1.08 (1.03–1.12)</b> | 1 (Ref.)                | 0.97 (0.91–1.04)        | 0.94 (0.86–1.03)        |
| Moderate                                              | 1.09 (0.99–1.20)        | <b>1.12 (1.06–1.19)</b> | 1 (Ref.)                | 0.96 (0.89–1.04)        |
| Heavy                                                 | <b>1.31 (1.17–1.46)</b> | <b>1.12 (1.03–1.23)</b> | 1.04 (0.96–1.13)        | 1 (Ref.)                |
| <b>Liver (n=15,333, IR=0.54)</b>                      |                         |                         |                         |                         |
| None                                                  | 1 (Ref.)                | <b>1.12 (1.04–1.21)</b> | <b>1.26 (1.09–1.46)</b> | 1.15 (1.00–1.33)        |
| Mild                                                  | 0.99 (0.92–1.06)        | 1 (Ref.)                | 1.03 (0.93–1.14)        | 0.91 (0.80–1.03)        |
| Moderate                                              | <b>1.25 (1.10–1.43)</b> | <b>1.10 (1.00–1.21)</b> | 1 (Ref.)                | <b>0.89 (0.80–0.99)</b> |
| Heavy                                                 | <b>1.39 (1.20–1.62)</b> | 1.11 (0.96–1.28)        | 1.11 (0.99–1.26)        | 1 (Ref.)                |
| <b>Gallbladder (n=9,244, IR=0.32)</b>                 |                         |                         |                         |                         |
| None                                                  | 1 (Ref.)                | <b>0.89 (0.80–0.99)</b> | <b>1.28 (1.04–1.57)</b> | <b>1.29 (1.03–1.61)</b> |
| Mild                                                  | 0.98 (0.89–1.07)        | 1 (Ref.)                | 0.92 (0.78–1.08)        | 0.86 (0.70–1.07)        |
| Moderate                                              | <b>1.25 (1.02–1.53)</b> | 1.06 (0.93–1.22)        | 1 (Ref.)                | 1.04 (0.87–1.24)        |
| Heavy                                                 | 0.95 (0.72–1.26)        | 1.16 (0.95–1.42)        | 1.07 (0.89–1.29)        | 1 (Ref.)                |
| <b>Pancreas (n=15,691, IR=0.55)</b>                   |                         |                         |                         |                         |
| None                                                  | 1 (Ref.)                | 1.04 (0.97–1.12)        | 1.02 (0.87–1.19)        | 1.06 (0.90–1.25)        |
| Mild                                                  | 1.01 (0.95–1.08)        | 1 (Ref.)                | 1.04 (0.94–1.16)        | 0.92 (0.80–1.06)        |
| Moderate                                              | 0.89 (0.76–1.04)        | 1.07 (0.97–1.17)        | 1 (Ref.)                | 0.93 (0.83–1.05)        |
| Heavy                                                 | 1.15 (0.97–1.36)        | 0.96 (0.83–1.11)        | 1.02 (0.90–1.15)        | 1 (Ref.)                |
| <b>Larynx (n=1,642, IR=0.55)</b>                      |                         |                         |                         |                         |
| None                                                  | 1 (Ref.)                | 1.01 (0.79–1.29)        | 1.10 (0.76–1.60)        | 1.31 (0.88–1.95)        |
| Mild                                                  | 1.10 (0.86–1.41)        | 1 (Ref.)                | <b>0.73 (0.55–0.95)</b> | 1.10 (0.80–1.53)        |
| Moderate                                              | <b>1.65 (1.12–2.41)</b> | 1.11 (0.85–1.45)        | 1 (Ref.)                | 0.93 (0.69–1.24)        |
| Heavy                                                 | 1.51 (0.95–2.41)        | <b>2.10 (1.55–2.85)</b> | 0.75 (0.54–1.03)        | 1 (Ref.)                |
| <b>Lung (n=32,096, IR=1.12)</b>                       |                         |                         |                         |                         |
| None                                                  | 1 (Ref.)                | <b>1.08 (1.02–1.14)</b> | <b>1.17 (1.05–1.31)</b> | <b>1.15 (1.02–1.28)</b> |
| Mild                                                  | <b>0.91 (0.86–0.96)</b> | 1 (Ref.)                | 1.01 (0.93–1.09)        | 0.96 (0.87–1.06)        |
| Moderate                                              | <b>0.87 (0.78–0.97)</b> | 1.02 (0.95–1.09)        | 1 (Ref.)                | 1.00 (0.92–1.09)        |
| Heavy                                                 | 1.03 (0.91–1.15)        | 1.00 (0.90–1.11)        | 0.98 (0.89–1.08)        | 1 (Ref.)                |
| <b>Breast (n=20,532, IR=0.72)</b>                     |                         |                         |                         |                         |
| None                                                  | 1 (Ref.)                | 0.97 (0.91–1.04)        | 0.83 (0.63–1.10)        | 1.07 (0.69–1.67)        |
| Mild                                                  | <b>0.94 (0.88–0.99)</b> | 1 (Ref.)                | 0.83 (0.66–1.03)        | 0.69 (0.45–1.06)        |

|                                                          |                         |                         |                          |                         |
|----------------------------------------------------------|-------------------------|-------------------------|--------------------------|-------------------------|
| Moderate                                                 | 0.92 (0.74–1.16)        | 1.02 (0.87–1.19)        | 1 (Ref.)                 | 1.15 (0.77–1.71)        |
| Heavy                                                    | 0.76 (0.49–1.17)        | 0.95 (0.68–1.32)        | <b>0.64 (0.43–0.97)</b>  | 1 (Ref.)                |
| <b>Cervix uteri (n=3,048, IR=0.11)</b>                   |                         |                         |                          |                         |
| None                                                     | 1 (Ref.)                | 0.93 (0.78–1.10)        | 1.10 (0.53–2.28)         | 1.36 (0.46–4.06)        |
| Mild                                                     | <b>1.23 (1.08–1.41)</b> | 1 (Ref.)                | 0.84 (0.44–1.59)         | 1.51 (0.56–4.07)        |
| Moderate                                                 | 0.99 (0.55–1.79)        | 0.77 (0.50–1.20)        | 1 (Ref.)                 | 1.30 (0.45–3.77)        |
| Heavy                                                    | 1.16 (0.43–3.10)        | 1.15 (0.54–2.43)        | 1.04 (0.38–2.86)         | 1 (Ref.)                |
| <b>Corpus uteri (n=2,828, IR=0.10)</b>                   |                         |                         |                          |                         |
| None                                                     | 1 (Ref.)                | 0.98 (0.81–1.18)        | 1.81 (0.63–5.19)         | 6.34 (0.75–53.77)       |
| Mild                                                     | <b>0.85 (0.73–0.99)</b> | 1 (Ref.)                | 1.74 (0.70–4.36)         | 6.63 (0.84–52.31)       |
| Moderate                                                 | 1.15 (0.67–1.99)        | 0.80 (0.49–1.31)        | 1 (Ref.)                 | 3.57 (0.40–32.00)       |
| Heavy                                                    | 0.89 (0.29–2.77)        | 1.36 (0.61–3.07)        | <b>4.21 (1.46–12.18)</b> | 1 (Ref.)                |
| <b>Ovary (n=3,866, IR=0.14)</b>                          |                         |                         |                          |                         |
| None                                                     | 1 (Ref.)                | 0.97 (0.84–1.13)        | 0.86 (0.44–1.66)         | 0.68 (0.24–1.94)        |
| Mild                                                     | 1.03 (0.92–1.16)        | 1 (Ref.)                | <b>0.51 (0.28–0.92)</b>  | 1.16 (0.52–2.59)        |
| Moderate                                                 | 1.06 (0.67–1.68)        | 0.81 (0.56–1.19)        | 1 (Ref.)                 | 0.55 (0.20–1.53)        |
| Heavy                                                    | 0.95 (0.39–2.28)        | 0.78 (0.35–1.74)        | 0.93 (0.40–2.18)         | 1 (Ref.)                |
| <b>Prostate (n=20,990, IR=0.73)</b>                      |                         |                         |                          |                         |
| None                                                     | 1 (Ref.)                | 0.97 (0.91–1.02)        | 1.01 (0.90–1.13)         | 0.95 (0.83–1.08)        |
| Mild                                                     | 1.04 (0.99–1.10)        | 1 (Ref.)                | 0.94 (0.87–1.02)         | 0.94 (0.84–1.04)        |
| Moderate                                                 | 1.08 (0.97–1.20)        | 0.93 (0.87–1.00)        | 1 (Ref.)                 | 0.98 (0.90–1.08)        |
| Heavy                                                    | <b>1.15 (1.01–1.30)</b> | 0.93 (0.83–1.04)        | 1.01 (0.92–1.12)         | 1 (Ref.)                |
| <b>Kidney (n=7,771, IR=0.27)</b>                         |                         |                         |                          |                         |
| None                                                     | 1 (Ref.)                | 1.00 (0.90–1.12)        | 0.83 (0.65–1.05)         | 0.96 (0.74–1.24)        |
| Mild                                                     | 0.96 (0.87–1.06)        | 1 (Ref.)                | <b>0.85 (0.73–0.99)</b>  | 0.85 (0.69–1.04)        |
| Moderate                                                 | 0.97 (0.78–1.21)        | 1.02 (0.89–1.17)        | 1 (Ref.)                 | 0.99 (0.84–1.17)        |
| Heavy                                                    | 1.10 (0.86–1.42)        | 0.89 (0.71–1.12)        | <b>0.73 (0.60–0.89)</b>  | 1 (Ref.)                |
| <b>Bladder (n=7,893, IR=0.28)</b>                        |                         |                         |                          |                         |
| None                                                     | 1 (Ref.)                | 0.98 (0.88–1.08)        | 0.95 (0.77–1.19)         | 1.07 (0.85–1.35)        |
| Mild                                                     | 1.01 (0.92–1.12)        | 1 (Ref.)                | <b>0.82 (0.70–0.95)</b>  | <b>0.75 (0.61–0.93)</b> |
| Moderate                                                 | 0.96 (0.78–1.18)        | 0.91 (0.80–1.05)        | 1 (Ref.)                 | 0.97 (0.82–1.14)        |
| Heavy                                                    | 1.22 (0.98–1.52)        | 0.93 (0.76–1.14)        | <b>0.81 (0.67–0.97)</b>  | 1 (Ref.)                |
| <b>Brain and central nerve system (n=3,613, IR=0.13)</b> |                         |                         |                          |                         |
| None                                                     | 1 (Ref.)                | <b>1.18 (1.00–1.39)</b> | 1.03 (0.71–1.49)         | 1.38 (0.92–2.07)        |
| Mild                                                     | <b>0.84 (0.72–0.98)</b> | 1 (Ref.)                | 1.22 (0.96–1.55)         | 1.16 (0.83–1.63)        |
| Moderate                                                 | 1.12 (0.82–1.52)        | 1.12 (0.90–1.38)        | 1 (Ref.)                 | 1.05 (0.78–1.41)        |
| Heavy                                                    | 1.38 (0.97–1.96)        | 1.08 (0.76–1.52)        | 0.86 (0.62–1.19)         | 1 (Ref.)                |
| <b>Hodgkin lymphoma (n=309, IR=0.01)</b>                 |                         |                         |                          |                         |
| None                                                     | 1 (Ref.)                | 0.76 (0.40–1.44)        | N/A                      | 1.19 (0.32–4.45)        |
| Mild                                                     | 0.60 (0.34–1.05)        | 1 (Ref.)                | 1.15 (0.53–2.47)         | 1.20 (0.42–3.46)        |
| Moderate                                                 | 0.85 (0.31–2.33)        | 0.88 (0.42–1.81)        | 1 (Ref.)                 | 0.75 (0.26–2.12)        |
| Heavy                                                    | 0.33 (0.05–2.38)        | 1.45 (0.57–3.70)        | 0.95 (0.36–2.51)         | 1 (Ref.)                |
| <b>Non-Hodgkin lymphoma (n=5,558, IR=0.19)</b>           |                         |                         |                          |                         |
| None                                                     | 1 (Ref.)                | 0.96 (0.84–1.10)        | 1.05 (0.78–1.41)         | 1.10 (0.80–1.51)        |
| Mild                                                     | <b>0.84 (0.74–0.95)</b> | 1 (Ref.)                | 1.00 (0.82–1.23)         | <b>0.73 (0.54–0.98)</b> |
| Moderate                                                 | 0.79 (0.59–1.06)        | 1.08 (0.92–1.28)        | 1 (Ref.)                 | 0.94 (0.75–1.18)        |
| Heavy                                                    | <b>0.64 (0.42–0.96)</b> | 1.06 (0.81–1.39)        | 0.80 (0.62–1.04)         | 1 (Ref.)                |
| <b>Multiple myeloma (n=2,353, IR=0.08)</b>               |                         |                         |                          |                         |
| None                                                     | 1 (Ref.)                | 1.03 (0.85–1.25)        | 1.43 (0.93–2.18)         | <b>1.86 (1.22–2.84)</b> |
| Mild                                                     | 0.93 (0.78–1.10)        | 1 (Ref.)                | 1.11 (0.81–1.53)         | 0.65 (0.39–1.07)        |
| Moderate                                                 | 1.22 (0.86–1.74)        | 0.88 (0.68–1.16)        | 1 (Ref.)                 | 1.05 (0.73–1.51)        |
| Heavy                                                    | 0.89 (0.53–1.49)        | 0.70 (0.44–1.14)        | 0.93 (0.62–1.39)         | 1 (Ref.)                |
| <b>Leukemia (n=3,533, IR=0.12)</b>                       |                         |                         |                          |                         |

|          |                  |                         |                  |                  |
|----------|------------------|-------------------------|------------------|------------------|
| None     | 1 (Ref.)         | <b>1.25 (1.06–1.47)</b> | 1.08 (0.77–1.51) | 1.10 (0.76–1.59) |
| Mild     | 0.89 (0.76–1.04) | 1 (Ref.)                | 0.91 (0.72–1.16) | 0.77 (0.55–1.09) |
| Moderate | 1.03 (0.74–1.44) | <b>1.26 (1.02–1.54)</b> | 1 (Ref.)         | 0.78 (0.58–1.05) |
| Heavy    | 1.03 (0.68–1.56) | 1.27 (0.92–1.77)        | 0.83 (0.61–1.13) | 1 (Ref.)         |

IR, incidence rate per 1,000 person-years

HRs are adjusted for age, sex, socioeconomic position (income level and place of residence), smoking status, physical activity, comorbidities (hypertension, diabetes, dyslipidemia, chronic kidney disease, and chronic obstructive pulmonary disease), and Charlson comorbidity index

**eTable 3.** Associations Between Changes in Drinking Level From 2009 to 2013 and Alcohol-Related Cancers

| Alcohol consumption status |          |          | Subject | Event       | IR  | aHR (95% CI)*           |
|----------------------------|----------|----------|---------|-------------|-----|-------------------------|
| 2009                       | 2011     | 2013     |         |             |     |                         |
| None                       | None     | None     | 19,873  | 7,087,021.8 | 2.8 | 1 (Ref.)                |
|                            |          | Mild     | 1,195   | 459,964.8   | 2.6 | 1.02 (0.96–1.08)        |
|                            |          | Moderate | 114     | 31,792.7    | 3.6 | <b>1.30 (1.07–1.58)</b> |
|                            |          | Heavy    | 49      | 15,031.9    | 3.3 | 1.28 (0.97–1.69)        |
|                            | Mild     | None     | 1,223   | 465,526.9   | 2.6 | 1.00 (0.95–1.06)        |
|                            |          | Mild     | 1,232   | 484,216.0   | 2.5 | 1.06 (1.00–1.12)        |
|                            |          | Moderate | 133     | 55,021.4    | 2.4 | 0.92 (0.77–1.10)        |
|                            |          | Heavy    | 62      | 16,407.7    | 3.8 | <b>1.47 (1.15–1.89)</b> |
|                            | Moderate | None     | 86      | 27,945.3    | 3.1 | 1.09 (0.88–1.35)        |
|                            |          | Mild     | 148     | 54,827.5    | 2.7 | 0.96 (0.81–1.14)        |
|                            |          | Moderate | 122     | 43,820.8    | 2.8 | 1.11 (0.93–1.33)        |
|                            |          | Heavy    | 73      | 19,198.6    | 3.8 | <b>1.61 (1.29–2.02)</b> |
|                            | Heavy    | None     | 70      | 12,669.7    | 5.5 | <b>1.90 (1.50–2.41)</b> |
|                            |          | Mild     | 52      | 17,250.3    | 3.0 | 1.27 (0.98–1.65)        |
|                            |          | Moderate | 51      | 19,761.5    | 2.6 | 1.06 (0.81–1.39)        |
|                            |          | Heavy    | 112     | 31,997.6    | 3.5 | <b>1.31 (1.09–1.59)</b> |
| Mild                       | None     | None     | 1,801   | 630,737.2   | 2.9 | <b>0.92 (0.87–0.98)</b> |
|                            |          | Mild     | 941     | 365,885.6   | 2.6 | 0.99 (0.92–1.07)        |
|                            |          | Moderate | 135     | 38,276.9    | 3.5 | <b>1.34 (1.12–1.59)</b> |
|                            |          | Heavy    | 45      | 13,242.9    | 3.4 | 1.18 (0.86–1.61)        |
|                            | Mild     | None     | 1,208   | 469,311.3   | 2.6 | 0.94 (0.88–1.00)        |
|                            |          | Mild     | 3,639   | 1,580,043.6 | 2.3 | 1 (Ref.)                |
|                            |          | Moderate | 540     | 225,312.6   | 2.4 | 1.04 (0.94–1.13)        |
|                            |          | Heavy    | 126     | 44,868.2    | 2.8 | 1.11 (0.92–1.33)        |
|                            | Moderate | None     | 174     | 45,075.0    | 3.9 | <b>1.27 (1.09–1.48)</b> |
|                            |          | Mild     | 562     | 225,463.1   | 2.5 | 1.05 (0.96–1.15)        |
|                            |          | Moderate | 405     | 161,040.8   | 2.5 | 1.07 (0.96–1.19)        |
|                            |          | Heavy    | 127     | 45,993.6    | 2.8 | <b>1.27 (1.07–1.50)</b> |
|                            | Heavy    | None     | 64      | 14,504.8    | 4.4 | <b>1.52 (1.20–1.94)</b> |
|                            |          | Mild     | 133     | 43,585.5    | 3.1 | 1.09 (0.91–1.30)        |
|                            |          | Moderate | 129     | 42,848.4    | 3.0 | 1.17 (0.98–1.40)        |
|                            |          | Heavy    | 132     | 39,853.1    | 3.3 | <b>1.21 (1.02–1.45)</b> |
| Moderate                   | None     | None     | 203     | 52,042.1    | 3.9 | 1.01 (0.86–1.19)        |
|                            |          | Mild     | 162     | 52,099.8    | 3.1 | 1.02 (0.86–1.22)        |
|                            |          | Moderate | 82      | 29,913.8    | 2.7 | 1.09 (0.86–1.37)        |
|                            |          | Heavy    | 49      | 14,015.8    | 3.5 | 1.05 (0.77–1.45)        |
|                            | Mild     | None     | 206     | 59,528.0    | 3.5 | 1.07 (0.92–1.25)        |
|                            |          | Mild     | 786     | 301,074.6   | 2.6 | 0.96 (0.86–1.07)        |
|                            |          | Moderate | 404     | 157,258.8   | 2.6 | 1.02 (0.90–1.16)        |
|                            |          | Heavy    | 139     | 40,680.5    | 3.4 | 1.19 (0.99–1.44)        |
|                            | Moderate | None     | 106     | 35,153.2    | 3.0 | 0.89 (0.72–1.10)        |
|                            |          | Mild     | 486     | 189,577.0   | 2.6 | 0.98 (0.87–1.10)        |
|                            |          | Moderate | 694     | 290,797.5   | 2.4 | 1 (Ref.)                |
|                            |          | Heavy    | 275     | 100,466.1   | 2.7 | 1.08 (0.94–1.25)        |
|                            | Heavy    | None     | 83      | 16,720.4    | 5.0 | <b>1.36 (1.08–1.71)</b> |
|                            |          | Mild     | 143     | 48,011.7    | 3.0 | 1.00 (0.83–1.20)        |

|       |          |          |       |           |     |                         |
|-------|----------|----------|-------|-----------|-----|-------------------------|
|       |          | Moderate | 255   | 100,260.7 | 2.5 | 0.96 (0.83–1.12)        |
|       |          | Heavy    | 299   | 105,201.9 | 2.8 | 1.07 (0.93–1.23)        |
| Heavy | None     | None     | 134   | 28,090.3  | 4.8 | 0.91 (0.76–1.10)        |
|       |          | Mild     | 80    | 19,988.6  | 4.0 | 0.99 (0.79–1.24)        |
|       |          | Moderate | 68    | 17,076.1  | 4.0 | 0.89 (0.68–1.16)        |
|       |          | Heavy    | 106   | 23,577.0  | 4.5 | 1.12 (0.92–1.38)        |
|       | Mild     | None     | 79    | 20,587.8  | 3.8 | <b>0.78 (0.61–0.99)</b> |
|       |          | Mild     | 213   | 70,216.5  | 3.0 | <b>0.85 (0.73–0.99)</b> |
|       |          | Moderate | 159   | 51,763.6  | 3.1 | 0.89 (0.75–1.06)        |
|       |          | Heavy    | 120   | 36,426.5  | 3.3 | 0.84 (0.70–1.03)        |
|       | Moderate | None     | 77    | 18,980.9  | 4.1 | 0.85 (0.67–1.08)        |
|       |          | Mild     | 202   | 65,248.8  | 3.1 | 0.90 (0.78–1.05)        |
|       |          | Moderate | 380   | 119,628.3 | 3.2 | 0.96 (0.85–1.09)        |
|       |          | Heavy    | 289   | 96,593.4  | 3.0 | 0.89 (0.78–1.01)        |
|       | Heavy    | None     | 138   | 28,663.2  | 4.8 | 1.00 (0.84–1.19)        |
|       |          | Mild     | 222   | 51,153.0  | 4.3 | 1.08 (0.93–1.25)        |
|       |          | Moderate | 362   | 116,944.3 | 3.1 | 0.89 (0.79–1.01)        |
|       |          | Heavy    | 1,075 | 304,657.6 | 3.5 | 1 (Ref.)                |

IR, incidence rate per 1,000 person-years; aHR, adjusted hazard ratio; CI, confidence interval

\*Adjusted for age, sex, socioeconomic position (income level and place of residence), smoking status, physical activity, comorbidities (hypertension, diabetes, dyslipidemia, chronic kidney disease, and chronic obstructive pulmonary disease), and Charlson comorbidity index

**eTable 4.** Associations Between Changes in Drinking Level From 2009 to 2013 and All Cancers

| Alcohol consumption status |          |          | Subject   | Event  | IR   | aHR (95% CI)*           |
|----------------------------|----------|----------|-----------|--------|------|-------------------------|
| 2009                       | 2011     | 2013     |           |        |      |                         |
| None                       | None     | None     | 1,614,929 | 54,098 | 7.7  | 1 (Ref.)                |
|                            |          | Mild     | 105,266   | 3,143  | 6.9  | 1.00 (0.96–1.04)        |
|                            |          | Moderate | 7,323     | 299    | 9.5  | 1.09 (0.97–1.23)        |
|                            |          | Heavy    | 3,455     | 160    | 10.8 | 1.10 (0.93–1.30)        |
|                            | Mild     | None     | 106,383   | 3,402  | 7.4  | 1.02 (0.98–1.06)        |
|                            |          | Mild     | 110,885   | 3,311  | 6.9  | 0.98 (0.95–1.02)        |
|                            |          | Moderate | 12,608    | 421    | 7.7  | 0.96 (0.87–1.06)        |
|                            |          | Heavy    | 3,758     | 161    | 9.9  | 1.12 (0.95–1.31)        |
|                            | Moderate | None     | 6,394     | 270    | 9.8  | 1.04 (0.92–1.18)        |
|                            |          | Mild     | 12,551    | 443    | 8.2  | 0.93 (0.84–1.02)        |
|                            |          | Moderate | 10,053    | 357    | 8.2  | 0.98 (0.88–1.09)        |
|                            |          | Heavy    | 4,408     | 179    | 9.4  | 1.03 (0.88–1.20)        |
|                            | Heavy    | None     | 2,922     | 172    | 13.7 | <b>1.32 (1.14–1.54)</b> |
|                            |          | Mild     | 3,961     | 170    | 10.0 | 1.14 (0.98–1.33)        |
|                            |          | Moderate | 4,545     | 180    | 9.2  | 1.00 (0.86–1.16)        |
|                            |          | Heavy    | 7,354     | 342    | 10.8 | <b>1.12 (1.00–1.25)</b> |
| Mild                       | None     | None     | 144,117   | 5,054  | 8.1  | 0.97 (0.93–1.01)        |
|                            |          | Mild     | 83,735    | 2,651  | 7.3  | 1.02 (0.97–1.06)        |
|                            |          | Moderate | 8,773     | 358    | 9.4  | <b>1.19 (1.06–1.32)</b> |
|                            |          | Heavy    | 3,037     | 132    | 10.1 | 1.15 (0.97–1.38)        |
|                            | Mild     | None     | 107,498   | 3,680  | 7.9  | 1.01 (0.97–1.05)        |
|                            |          | Mild     | 362,504   | 10,606 | 6.8  | 1 (Ref.)                |
|                            |          | Moderate | 51,708    | 1,627  | 7.3  | 1.01 (0.96–1.06)        |
|                            |          | Heavy    | 10,288    | 386    | 8.7  | <b>1.12 (1.01–1.24)</b> |
|                            | Moderate | None     | 10,340    | 463    | 10.4 | 1.09 (0.99–1.20)        |
|                            |          | Mild     | 51,765    | 1,675  | 7.5  | 1.01 (0.95–1.06)        |
|                            |          | Moderate | 36,959    | 1,181  | 7.4  | 1.02 (0.96–1.09)        |
|                            |          | Heavy    | 10,567    | 369    | 8.1  | 1.06 (0.96–1.18)        |
|                            | Heavy    | None     | 3,341     | 178    | 12.4 | <b>1.22 (1.05–1.42)</b> |
|                            |          | Mild     | 10,012    | 382    | 8.9  | 1.04 (0.94–1.16)        |
|                            |          | Moderate | 9,840     | 355    | 8.4  | 1.02 (0.92–1.14)        |
|                            |          | Heavy    | 9,158     | 418    | 10.6 | <b>1.22 (1.10–1.35)</b> |
| Moderate                   | None     | None     | 11,942    | 603    | 11.7 | 0.99 (0.90–1.09)        |
|                            |          | Mild     | 11,964    | 522    | 10.1 | <b>1.11 (1.00–1.23)</b> |
|                            |          | Moderate | 6,861     | 270    | 9.1  | 1.09 (0.96–1.25)        |
|                            |          | Heavy    | 3,215     | 142    | 10.2 | 1.11 (0.93–1.33)        |
|                            | Mild     | None     | 13,689    | 611    | 10.4 | 1.00 (0.91–1.10)        |
|                            |          | Mild     | 69,131    | 2,286  | 7.7  | 0.95 (0.90–1.01)        |
|                            |          | Moderate | 36,098    | 1,195  | 7.7  | 1.01 (0.94–1.08)        |
|                            |          | Heavy    | 9,362     | 400    | 9.9  | <b>1.13 (1.01–1.26)</b> |
|                            | Moderate | None     | 8,070     | 367    | 10.6 | 1.00 (0.89–1.13)        |
|                            |          | Mild     | 43,605    | 1,523  | 8.1  | 1.01 (0.95–1.08)        |
|                            |          | Moderate | 66,854    | 2,073  | 7.2  | 1 (Ref.)                |
|                            |          | Heavy    | 23,092    | 801    | 8.0  | 1.06 (0.97–1.15)        |
|                            | Heavy    | None     | 3,876     | 217    | 13.2 | 1.09 (0.95–1.27)        |
|                            |          | Mild     | 11,030    | 457    | 9.6  | 1.08 (0.97–1.20)        |



|       |          |          |        |       |      |                         |
|-------|----------|----------|--------|-------|------|-------------------------|
|       |          | Moderate | 23,066 | 783   | 7.9  | 0.97 (0.89–1.05)        |
|       |          | Heavy    | 24,184 | 874   | 8.4  | 1.02 (0.94–1.11)        |
| Heavy | None     | None     | 6,515  | 398   | 14.4 | 0.97 (0.87–1.09)        |
|       |          | Mild     | 4,605  | 250   | 12.7 | 1.08 (0.95–1.24)        |
|       |          | Moderate | 3,937  | 190   | 11.3 | 1.04 (0.90–1.21)        |
|       |          | Heavy    | 5,418  | 302   | 13.0 | <b>1.16 (1.03–1.32)</b> |
|       | Mild     | None     | 4,726  | 256   | 12.6 | 0.90 (0.79–1.03)        |
|       |          | Mild     | 16,139 | 620   | 8.9  | <b>0.89 (0.81–0.98)</b> |
|       |          | Moderate | 11,911 | 440   | 8.6  | <b>0.88 (0.80–0.98)</b> |
|       |          | Heavy    | 8,369  | 362   | 10.0 | 0.94 (0.84–1.05)        |
|       | Moderate | None     | 4,379  | 237   | 12.7 | 0.97 (0.85–1.11)        |
|       |          | Mild     | 15,049 | 607   | 9.4  | 0.94 (0.86–1.02)        |
|       |          | Moderate | 27,597 | 1,054 | 8.9  | 1.02 (0.94–1.09)        |
|       |          | Heavy    | 22,232 | 825   | 8.6  | 0.93 (0.86–1.01)        |
|       | Heavy    | None     | 6,616  | 411   | 14.6 | 0.99 (0.89–1.11)        |
|       |          | Mild     | 11,822 | 569   | 11.2 | 1.00 (0.91–1.10)        |
|       |          | Moderate | 26,960 | 1,054 | 9.1  | 0.94 (0.88–1.01)        |
|       |          | Heavy    | 70,176 | 2,983 | 9.9  | 1 (Ref.)                |

IR, incidence rate per 1,000 person-years; aHR, adjusted hazard ratio; CI, confidence interval

\*Adjusted for age, sex, socioeconomic position (income level and place of residence), smoking status, physical activity, comorbidities (hypertension, diabetes, dyslipidemia, chronic kidney disease, and chronic obstructive pulmonary disease), and Charlson comorbidity index

**eTable 5.** Adjusted Hazard Ratios\* and 95% Confidence Intervals for Cancer According to Changes in Drinking Level by Age

| 2011<br>2009                                |          | Male                    |                         |                         |                         | Female                  |                  |                  |                         |
|---------------------------------------------|----------|-------------------------|-------------------------|-------------------------|-------------------------|-------------------------|------------------|------------------|-------------------------|
|                                             |          | None                    | Mild                    | Moderate                | Heavy                   | None                    | Mild             | Moderate         | Heavy                   |
| <b>Alcohol-related cancers</b>              |          |                         |                         |                         |                         |                         |                  |                  |                         |
| <65 years                                   | None     | 1 (Ref.)                | 1.05 (1.00–1.12)        | <b>1.14 (1.03–1.26)</b> | <b>1.34 (1.20–1.50)</b> | 1 (Ref.)                | 0.99 (0.94–1.03) | 0.96 (0.80–1.15) | 0.85 (0.60–1.21)        |
|                                             | Mild     | <b>1.07 (1.01–1.13)</b> | 1 (Ref.)                | <b>1.10 (1.04–1.17)</b> | <b>1.20 (1.09–1.31)</b> | 0.99 (0.94–1.05)        | 1 (Ref.)         | 1.04 (0.91–1.18) | 0.81 (0.60–1.09)        |
|                                             | Moderate | <b>1.12 (1.01–1.24)</b> | 1.02 (0.96–1.09)        | 1 (Ref.)                | 1.04 (0.96–1.12)        | 0.92 (0.73–1.15)        | 0.81 (0.67–0.98) | 1 (Ref.)         | 0.68 (0.49–0.96)        |
|                                             | Heavy    | <b>1.13 (1.01–1.26)</b> | 0.94 (0.86–1.03)        | <b>0.91 (0.85–0.98)</b> | 1 (Ref.)                | 0.95 (0.64–1.41)        | 0.87 (0.61–1.23) | 1.11 (0.79–1.57) | 1 (Ref.)                |
| ≥65 years                                   | None     | 1 (Ref.)                | <b>1.11 (1.04–1.19)</b> | <b>1.40 (1.23–1.59)</b> | <b>1.70 (1.48–1.94)</b> | 1 (Ref.)                | 1.06 (0.95–1.18) | 0.93 (0.57–1.52) | 0.71 (0.27–1.89)        |
|                                             | Mild     | 0.98 (0.91–1.05)        | 1 (Ref.)                | <b>1.21 (1.11–1.32)</b> | <b>1.21 (1.07–1.37)</b> | 0.95 (0.81–1.12)        | 1 (Ref.)         | 0.97 (0.60–1.57) | 1.26 (0.59–2.67)        |
|                                             | Moderate | 1.10 (0.97–1.25)        | 0.91 (0.82–1.01)        | 1 (Ref.)                | 1.12 (0.99–1.26)        | 0.62 (0.27–1.42)        | 1.44 (0.69–3.03) | 1 (Ref.)         | 1.36 (0.45–4.08)        |
|                                             | Heavy    | 1.00 (0.89–1.13)        | <b>0.89 (0.79–0.99)</b> | <b>0.90 (0.81–1.00)</b> | 1 (Ref.)                | 0.54 (0.16–1.81)        | 0.89 (0.29–2.76) | 0.66 (0.16–2.78) | 1 (Ref.)                |
| <b>All cancers (except thyroid cancers)</b> |          |                         |                         |                         |                         |                         |                  |                  |                         |
| <65 years                                   | None     | 1 (Ref.)                | 1.00 (0.97–1.03)        | 1.04 (0.98–1.10)        | <b>1.17 (1.10–1.26)</b> | 1 (Ref.)                | 1.00 (0.96–1.03) | 0.95 (0.83–1.09) | 1.00 (0.80–1.27)        |
|                                             | Mild     | <b>1.05 (1.01–1.08)</b> | 1 (Ref.)                | <b>1.04 (1.01–1.08)</b> | <b>1.11 (1.05–1.18)</b> | 1.01 (0.97–1.06)        | 1 (Ref.)         | 1.03 (0.94–1.14) | 1.00 (0.82–1.21)        |
|                                             | Moderate | <b>1.16 (1.09–1.24)</b> | 0.99 (0.96–1.03)        | 1 (Ref.)                | 1.00 (0.96–1.05)        | 1.03 (0.87–1.22)        | 0.98 (0.85–1.13) | 1 (Ref.)         | 0.85 (0.66–1.08)        |
|                                             | Heavy    | <b>1.11 (1.04–1.19)</b> | 0.94 (0.89–1.00)        | 0.96 (0.92–1.00)        | 1 (Ref.)                | 0.96 (0.72–1.29)        | 0.96 (0.74–1.24) | 1.04 (0.80–1.36) | 1 (Ref.)                |
| ≥65 years                                   | None     | 1 (Ref.)                | 1.00 (0.96–1.04)        | <b>1.09 (1.02–1.17)</b> | <b>1.22 (1.12–1.32)</b> | 1 (Ref.)                | 1.00 (0.93–1.07) | 1.05 (0.79–1.39) | 1.03 (0.63–1.69)        |
|                                             | Mild     | 1.01 (0.97–1.05)        | 1 (Ref.)                | 1.04 (0.99–1.09)        | 1.07 (1.00–1.15)        | 0.97 (0.88–1.07)        | 1 (Ref.)         | 1.03 (0.77–1.37) | 0.79 (0.45–1.40)        |
|                                             | Moderate | 1.06 (0.98–1.14)        | 0.95 (0.90–1.01)        | 1 (Ref.)                | 1.03 (0.96–1.10)        | 0.81 (0.49–1.33)        | 1.04 (0.64–1.69) | 1 (Ref.)         | 1.76 (0.93–3.34)        |
|                                             | Heavy    | <b>1.08 (1.00–1.16)</b> | <b>0.89 (0.83–0.96)</b> | 0.94 (0.89–1.00)        | 1 (Ref.)                | 0.64 (0.31–1.30)        | 0.85 (0.42–1.71) | 0.95 (0.43–2.09) | 1 (Ref.)                |
| <b>Death</b>                                |          |                         |                         |                         |                         |                         |                  |                  |                         |
| <65 years                                   | None     | 1 (Ref.)                | 0.94 (0.89–1.00)        | 1.09 (1.00–1.20)        | <b>1.26 (1.13–1.40)</b> | 1 (Ref.)                | 1.01 (0.93–1.10) | 0.97 (0.71–1.34) | 1.01 (0.59–1.74)        |
|                                             | Mild     | <b>1.22 (1.16–1.30)</b> | 1 (Ref.)                | <b>1.10 (1.03–1.17)</b> | <b>1.30 (1.19–1.42)</b> | 1.03 (0.93–1.15)        | 1 (Ref.)         | 1.04 (0.82–1.31) | 1.41 (0.95–2.09)        |
|                                             | Moderate | <b>1.38 (1.25–1.51)</b> | 1.03 (0.97–1.10)        | 1 (Ref.)                | 1.06 (0.98–1.14)        | <b>1.45 (1.01–2.06)</b> | 0.95 (0.69–1.32) | 1 (Ref.)         | <b>1.71 (1.13–2.59)</b> |
|                                             | Heavy    | <b>1.50 (1.36–1.65)</b> | 1.01 (0.93–1.10)        | 0.94 (0.88–1.00)        | 1 (Ref.)                | 0.81 (0.47–1.40)        | 0.63 (0.38–1.03) | 1.00 (0.64–1.56) | 1 (Ref.)                |
| ≥65 years                                   | None     | 1 (Ref.)                | <b>0.93 (0.89–0.97)</b> | 1.04 (0.96–1.13)        | <b>1.25 (1.15–1.36)</b> | 1 (Ref.)                | 1.02 (0.95–1.09) | 0.96 (0.71–1.30) | <b>1.62 (1.06–2.49)</b> |

|       |          |                         |                  |                         |                         |                         |                  |                  |                  |
|-------|----------|-------------------------|------------------|-------------------------|-------------------------|-------------------------|------------------|------------------|------------------|
| years | Mild     | <b>1.28 (1.22–1.33)</b> | 1 (Ref.)         | <b>1.17 (1.10–1.24)</b> | <b>1.40 (1.30–1.52)</b> | <b>1.19 (1.06–1.34)</b> | 1 (Ref.)         | 1.04 (0.74–1.48) | 1.04 (0.58–1.84) |
|       | Moderate | <b>1.40 (1.29–1.53)</b> | 1.03 (0.96–1.11) | 1 (Ref.)                | <b>1.16 (1.06–1.26)</b> | 1.22 (0.73–2.06)        | 1.16 (0.68–2.01) | 1 (Ref.)         | 1.69 (0.78–3.68) |
|       | Heavy    | <b>1.38 (1.28–1.49)</b> | 0.97 (0.90–1.05) | 0.95 (0.89–1.02)        | 1 (Ref.)                | 1.25 (0.59–2.65)        | 0.96 (0.42–2.21) | 1.18 (0.44–3.15) | 1 (Ref.)         |

\*Adjusted for sex, socioeconomic position (income level and place of residence), smoking status, comorbidities (hypertension, diabetes, dyslipidemia, chronic kidney disease, and chronic obstructive pulmonary disease), and Charlson comorbidity index

**eTable 6.** Adjusted Hazard Ratios\* and 95% Confidence Intervals for Cancer According to Changes in Drinking Level by Sex

|                                             |          | 2011                    | None                    | Mild                    | Moderate                | Heavy |
|---------------------------------------------|----------|-------------------------|-------------------------|-------------------------|-------------------------|-------|
| <b>Alcohol-related cancers</b>              |          |                         |                         |                         |                         |       |
| Male                                        | None     | 1 (Ref.)                | <b>1.07 (1.03–1.12)</b> | <b>1.22 (1.13–1.32)</b> | <b>1.47 (1.35–1.60)</b> |       |
|                                             | Mild     | 1.02 (0.97–1.06)        | 1 (Ref.)                | <b>1.14 (1.08–1.19)</b> | <b>1.20 (1.12–1.29)</b> |       |
|                                             | Moderate | <b>1.10 (1.02–1.19)</b> | 0.99 (0.93–1.04)        | 1 (Ref.)                | 1.05 (0.99–1.12)        |       |
|                                             | Heavy    | 1.06 (0.97–1.15)        | <b>0.92 (0.86–0.98)</b> | <b>0.90 (0.85–0.96)</b> | 1 (Ref.)                |       |
| Female                                      | None     | 1 (Ref.)                | 1.01 (0.97–1.05)        | 0.96 (0.81–1.14)        | 0.83 (0.60–1.16)        |       |
|                                             | Mild     | 0.99 (0.94–1.04)        | 1 (Ref.)                | 1.03 (0.91–1.17)        | 0.84 (0.64–1.12)        |       |
|                                             | Moderate | 0.86 (0.69–1.07)        | 0.84 (0.70–1.01)        | 1 (Ref.)                | 0.72 (0.52–1.00)        |       |
|                                             | Heavy    | 0.90 (0.62–1.31)        | 0.88 (0.63–1.22)        | 1.08 (0.78–1.51)        | 1 (Ref.)                |       |
| <b>All cancers (except thyroid cancers)</b> |          |                         |                         |                         |                         |       |
| Male                                        | None     | 1 (Ref.)                | 0.99 (0.97–1.02)        | <b>1.05 (1.00–1.10)</b> | <b>1.19 (1.13–1.25)</b> |       |
|                                             | Mild     | 1.02 (0.99–1.05)        | 1 (Ref.)                | <b>1.04 (1.01–1.07)</b> | <b>1.10 (1.05–1.15)</b> |       |
|                                             | Moderate | <b>1.10 (1.05–1.15)</b> | 0.98 (0.95–1.01)        | 1 (Ref.)                | 1.01 (0.97–1.05)        |       |
|                                             | Heavy    | <b>1.08 (1.03–1.14)</b> | <b>0.92 (0.88–0.96)</b> | <b>0.95 (0.92–0.99)</b> | 1 (Ref.)                |       |
| Female                                      | None     | 1 (Ref.)                | 1.00 (0.98–1.03)        | 0.97 (0.86–1.09)        | 1.01 (0.82–1.24)        |       |
|                                             | Mild     | 1.01 (0.97–1.05)        | 1 (Ref.)                | 1.03 (0.94–1.12)        | 0.96 (0.80–1.16)        |       |
|                                             | Moderate | 0.99 (0.84–1.16)        | 0.99 (0.86–1.13)        | 1 (Ref.)                | 0.93 (0.74–1.17)        |       |
|                                             | Heavy    | 0.90 (0.69–1.18)        | 0.94 (0.74–1.20)        | 1.03 (0.80–1.32)        | 1 (Ref.)                |       |
| <b>Death</b>                                |          |                         |                         |                         |                         |       |
| Male                                        | None     | 1 (Ref.)                | <b>0.94 (0.91–0.97)</b> | <b>1.07 (1.01–1.14)</b> | <b>1.27 (1.19–1.35)</b> |       |
|                                             | Mild     | <b>1.26 (1.22–1.31)</b> | 1 (Ref.)                | <b>1.14 (1.09–1.19)</b> | <b>1.36 (1.28–1.44)</b> |       |
|                                             | Moderate | <b>1.41 (1.32–1.50)</b> | 1.03 (0.98–1.08)        | 1 (Ref.)                | <b>1.11 (1.05–1.17)</b> |       |
|                                             | Heavy    | <b>1.43 (1.34–1.51)</b> | 0.99 (0.93–1.04)        | <b>0.94 (0.90–0.99)</b> | 1 (Ref.)                |       |
| Female                                      | None     | 1 (Ref.)                | <b>1.06 (1.00–1.12)</b> | 1.03 (0.82–1.28)        | <b>1.41 (1.01–1.98)</b> |       |
|                                             | Mild     | <b>1.09 (1.01–1.18)</b> | 1 (Ref.)                | 1.05 (0.87–1.27)        | 1.27 (0.92–1.76)        |       |
|                                             | Moderate | 1.30 (0.98–1.74)        | 0.96 (0.73–1.27)        | 1 (Ref.)                | <b>1.72 (1.20–2.47)</b> |       |
|                                             | Heavy    | 0.90 (0.59–1.37)        | 0.67 (0.44–1.02)        | 1.00 (0.67–1.50)        | 1 (Ref.)                |       |

\*Adjusted for age, socioeconomic position (income level and place of residence), smoking status, comorbidities (hypertension, diabetes, dyslipidemia, chronic kidney disease, and chronic obstructive pulmonary disease), and Charlson comorbidity index

**eTable 7.** Adjusted Hazard Ratios and 95% Confidence Intervals for Cancer According to Changes in Drinking Level by Smoking Status in 2009 (Male)

| 2009 \ 2011                                 |          | None                    | Mild                    | Moderate                | Heavy                   |
|---------------------------------------------|----------|-------------------------|-------------------------|-------------------------|-------------------------|
| <b>Alcohol-related cancers</b>              |          |                         |                         |                         |                         |
| Never smoker                                | None     | 1 (Ref.)                | 1.04 (0.96–1.12)        | <b>1.26 (1.09–1.47)</b> | <b>1.77 (1.51–2.08)</b> |
|                                             | Mild     | 0.99 (0.92–1.07)        | 1 (Ref.)                | 1.08 (0.97–1.20)        | <b>1.32 (1.14–1.54)</b> |
|                                             | Moderate | 1.09 (0.95–1.26)        | 0.95 (0.84–1.08)        | 1 (Ref.)                | 1.06 (0.91–1.24)        |
|                                             | Heavy    | 1.05 (0.92–1.19)        | 0.89 (0.77–1.02)        | 0.97 (0.85–1.10)        | 1 (Ref.)                |
| Former smoker, <20 PY                       | None     | 1 (Ref.)                | 0.97 (0.87–1.07)        | 1.21 (1.00–1.46)        | 1.09 (0.84–1.43)        |
|                                             | Mild     | <b>1.14 (1.03–1.26)</b> | 1 (Ref.)                | <b>1.34 (1.20–1.49)</b> | 1.18 (0.96–1.44)        |
|                                             | Moderate | 1.01 (0.80–1.27)        | 0.95 (0.83–1.08)        | 1 (Ref.)                | 1.00 (0.84–1.18)        |
|                                             | Heavy    | 1.02 (0.78–1.34)        | 0.92 (0.77–1.11)        | 0.85 (0.72–1.00)        | 1 (Ref.)                |
| Former smoker, ≥20 PY                       | None     | 1 (Ref.)                | 1.04 (0.93–1.16)        | 1.09 (0.90–1.33)        | <b>1.35 (1.10–1.64)</b> |
|                                             | Mild     | 1.07 (0.95–1.20)        | 1 (Ref.)                | 1.13 (1.00–1.27)        | 1.14 (0.95–1.36)        |
|                                             | Moderate | <b>1.34 (1.11–1.62)</b> | 1.02 (0.89–1.17)        | 1 (Ref.)                | 1.09 (0.94–1.27)        |
|                                             | Heavy    | 1.19 (0.99–1.44)        | 0.94 (0.80–1.11)        | 0.91 (0.79–1.04)        | 1 (Ref.)                |
| Current smoker, <20 PY                      | None     | 1 (Ref.)                | 1.15 (1.02–1.30)        | 1.19 (0.97–1.47)        | <b>1.63 (1.27–2.09)</b> |
|                                             | Mild     | 0.93 (0.82–1.06)        | 1 (Ref.)                | 1.03 (0.92–1.17)        | 0.90 (0.72–1.12)        |
|                                             | Moderate | 0.89 (0.70–1.15)        | 0.93 (0.82–1.05)        | 1 (Ref.)                | 0.86 (0.72–1.02)        |
|                                             | Heavy    | 1.29 (0.97–1.72)        | 1.09 (0.90–1.31)        | 1.03 (0.87–1.23)        | 1 (Ref.)                |
| Current smoker, ≥20 PY                      | None     | 1 (Ref.)                | <b>1.27 (1.14–1.41)</b> | <b>1.35 (1.16–1.58)</b> | <b>1.49 (1.27–1.75)</b> |
|                                             | Mild     | 0.97 (0.87–1.08)        | 1 (Ref.)                | <b>1.12 (1.02–1.24)</b> | <b>1.29 (1.14–1.47)</b> |
|                                             | Moderate | 1.07 (0.89–1.28)        | 1.04 (0.94–1.16)        | 1 (Ref.)                | <b>1.15 (1.04–1.28)</b> |
|                                             | Heavy    | 0.90 (0.74–1.09)        | 0.88 (0.78–1.00)        | <b>0.86 (0.78–0.95)</b> | 1 (Ref.)                |
| <b>All cancers (except thyroid cancers)</b> |          |                         |                         |                         |                         |
| Never smoker                                | None     | 1 (Ref.)                | 1.01 (0.96–1.05)        | <b>1.14 (1.04–1.25)</b> | <b>1.41 (1.28–1.56)</b> |
|                                             | Mild     | 1.02 (0.98–1.07)        | 1 (Ref.)                | 1.00 (0.94–1.07)        | <b>1.20 (1.10–1.32)</b> |
|                                             | Moderate | <b>1.10 (1.02–1.20)</b> | 0.95 (0.88–1.02)        | 1 (Ref.)                | 0.99 (0.91–1.09)        |
|                                             | Heavy    | <b>1.11 (1.02–1.20)</b> | <b>0.87 (0.80–0.95)</b> | 0.93 (0.86–1.01)        | 1 (Ref.)                |
| Former smoker, <20 PY                       | None     | 1 (Ref.)                | 1.01 (0.95–1.06)        | 1.07 (0.96–1.20)        | 1.03 (0.87–1.20)        |
|                                             | Mild     | 1.01 (0.95–1.07)        | 1 (Ref.)                | 1.12 (1.05–1.20)        | 1.04 (0.92–1.17)        |
|                                             | Moderate | 1.11 (0.97–1.26)        | <b>0.92 (0.85–0.99)</b> | 1 (Ref.)                | 0.99 (0.89–1.09)        |
|                                             | Heavy    | 1.03 (0.87–1.22)        | 0.95 (0.85–1.07)        | 0.98 (0.89–1.08)        | 1 (Ref.)                |
| Former smoker, ≥20 PY                       | None     | 1 (Ref.)                | 0.96 (0.91–1.02)        | 1.02 (0.91–1.14)        | 1.08 (0.96–1.22)        |
|                                             | Mild     | 1.06 (0.99–1.13)        | 1 (Ref.)                | 1.08 (1.01–1.15)        | 1.09 (0.98–1.20)        |
|                                             | Moderate | 1.07 (0.95–1.19)        | 1.03 (0.95–1.11)        | 1 (Ref.)                | 1.00 (0.92–1.09)        |
|                                             | Heavy    | 1.04 (0.92–1.17)        | 0.92 (0.83–1.02)        | 0.93 (0.85–1.00)        | 1 (Ref.)                |
| Current smoker, <20 PY                      | None     | 1 (Ref.)                | 0.99 (0.92–1.07)        | 0.93 (0.81–1.07)        | 1.15 (0.97–1.36)        |
|                                             | Mild     | 0.97 (0.90–1.05)        | 1 (Ref.)                | 0.99 (0.92–1.07)        | 0.95 (0.83–1.08)        |
|                                             | Moderate | 0.93 (0.80–1.09)        | 0.95 (0.88–1.03)        | 1 (Ref.)                | 0.89 (0.80–1.00)        |
|                                             | Heavy    | <b>1.24 (1.04–1.49)</b> | 1.06 (0.94–1.20)        | 1.07 (0.96–1.19)        | 1 (Ref.)                |
| Current smoker, ≥20 PY                      | None     | 1 (Ref.)                | 1.01 (0.95–1.07)        | 1.08 (0.99–1.17)        | <b>1.18 (1.08–1.30)</b> |
|                                             | Mild     | 1.00 (0.94–1.07)        | 1 (Ref.)                | 1.01 (0.96–1.07)        | <b>1.09 (1.00–1.17)</b> |
|                                             | Moderate | <b>1.16 (1.05–1.28)</b> | 1.02 (0.96–1.08)        | 1 (Ref.)                | <b>1.07 (1.00–1.14)</b> |
|                                             | Heavy    | 1.01 (0.90–1.13)        | 0.92 (0.86–1.00)        | 0.95 (0.90–1.01)        | 1 (Ref.)                |
| <b>Death</b>                                |          |                         |                         |                         |                         |
| Never                                       | None     | 1 (Ref.)                | <b>0.92 (0.87–0.98)</b> | 1.03 (0.91–1.16)        | <b>1.37 (1.21–1.55)</b> |

|                        |          |                         |                         |                         |                         |
|------------------------|----------|-------------------------|-------------------------|-------------------------|-------------------------|
| smoker                 | Mild     | <b>1.30 (1.23–1.37)</b> | 1 (Ref.)                | <b>1.19 (1.09–1.30)</b> | <b>1.61 (1.43–1.81)</b> |
|                        | Moderate | <b>1.46 (1.30–1.64)</b> | 1.09 (0.98–1.22)        | 1 (Ref.)                | 1.07 (0.93–1.23)        |
|                        | Heavy    | <b>1.39 (1.26–1.54)</b> | 0.97 (0.87–1.09)        | 1.00 (0.89–1.11)        | 1 (Ref.)                |
| Former smoker, <20 PY  | None     | 1 (Ref.)                | <b>0.88 (0.81–0.95)</b> | 1.04 (0.87–1.23)        | <b>1.34 (1.09–1.64)</b> |
|                        | Mild     | <b>1.26 (1.15–1.38)</b> | 1 (Ref.)                | 1.14 (1.02–1.28)        | <b>1.23 (1.02–1.48)</b> |
|                        | Moderate | <b>1.39 (1.14–1.69)</b> | 1.08 (0.94–1.23)        | 1 (Ref.)                | 1.11 (0.94–1.32)        |
|                        | Heavy    | 1.24 (0.99–1.54)        | 0.88 (0.73–1.05)        | <b>0.84 (0.71–0.99)</b> | 1 (Ref.)                |
| Former smoker, ≥20 PY  | None     | 1 (Ref.)                | <b>0.92 (0.85–0.99)</b> | 1.01 (0.87–1.16)        | 1.13 (0.98–1.32)        |
|                        | Mild     | <b>1.29 (1.19–1.41)</b> | 1 (Ref.)                | 1.10 (0.99–1.22)        | <b>1.29 (1.12–1.48)</b> |
|                        | Moderate | <b>1.43 (1.23–1.67)</b> | 1.10 (0.98–1.24)        | 1 (Ref.)                | <b>1.23 (1.08–1.41)</b> |
|                        | Heavy    | <b>1.46 (1.27–1.67)</b> | 0.95 (0.83–1.09)        | 0.91 (0.81–1.03)        | 1 (Ref.)                |
| Current smoker, <20 PY | None     | 1 (Ref.)                | 1.02 (0.93–1.12)        | 1.07 (0.91–1.27)        | 1.18 (0.96–1.45)        |
|                        | Mild     | <b>1.13 (1.02–1.25)</b> | 1 (Ref.)                | 1.07 (0.97–1.19)        | 1.15 (0.97–1.36)        |
|                        | Moderate | 1.06 (0.87–1.28)        | 0.91 (0.81–1.01)        | 1 (Ref.)                | 1.02 (0.89–1.18)        |
|                        | Heavy    | <b>1.44 (1.17–1.76)</b> | 1.09 (0.94–1.27)        | 1.09 (0.95–1.26)        | 1 (Ref.)                |
| Current smoker, ≥20 PY | None     | 1 (Ref.)                | 1.01 (0.94–1.08)        | <b>1.17 (1.05–1.31)</b> | <b>1.30 (1.16–1.45)</b> |
|                        | Mild     | <b>1.15 (1.06–1.24)</b> | 1 (Ref.)                | <b>1.12 (1.03–1.21)</b> | <b>1.34 (1.21–1.48)</b> |
|                        | Moderate | <b>1.37 (1.21–1.56)</b> | 0.99 (0.91–1.08)        | 1 (Ref.)                | <b>1.12 (1.03–1.22)</b> |
|                        | Heavy    | <b>1.34 (1.19–1.51)</b> | 0.99 (0.90–1.09)        | <b>0.90 (0.83–0.97)</b> | 1 (Ref.)                |

PY, pack-years

\*Adjusted for age, socioeconomic position (income level and place of residence), smoking status, comorbidities (hypertension, diabetes, dyslipidemia, chronic kidney disease, and chronic obstructive pulmonary disease), and Charlson comorbidity index

**eTable 8.** Adjusted Hazard Ratios and 95% Confidence Intervals for Cancer According to Changes in Drinking Level by Smoking Status in 2009 (Female)

| 2009 \ 2011                                 |          | None                    | Mild                    | Moderate          | Heavy                   |
|---------------------------------------------|----------|-------------------------|-------------------------|-------------------|-------------------------|
| <b>Alcohol-related cancers</b>              |          |                         |                         |                   |                         |
| Never smoker                                | None     | 1 (Ref.)                | 1.01 (0.96–1.05)        | 0.94 (0.78–1.14)  | 0.92 (0.64–1.33)        |
|                                             | Mild     | 1.00 (0.95–1.06)        | 1 (Ref.)                | 1.05 (0.92–1.20)  | 0.89 (0.65–1.22)        |
|                                             | Moderate | 0.90 (0.71–1.14)        | 0.87 (0.70–1.07)        | 1 (Ref.)          | 0.78 (0.52–1.16)        |
|                                             | Heavy    | 1.02 (0.65–1.59)        | 0.99 (0.65–1.52)        | 1.09 (0.70–1.71)  | 1 (Ref.)                |
| Former smoker, <20 PY                       | None     | 1 (Ref.)                | 1.16 (0.82–1.64)        | 1.08 (0.44–2.64)  | N/A                     |
|                                             | Mild     | <b>0.57 (0.35–0.93)</b> | 1 (Ref.)                | 1.07 (0.62–1.86)  | 0.81 (0.26–2.56)        |
|                                             | Moderate | 1.55 (0.48–5.02)        | 1.25 (0.51–3.10)        | 1 (Ref.)          | 0.32 (0.04–2.65)        |
|                                             | Heavy    | 1.32 (0.32–5.48)        | 1.00 (0.32–3.16)        | 1.42 (0.50–4.02)  | 1 (Ref.)                |
| Former smoker, ≥20 PY                       | None     | 1 (Ref.)                | 1.94 (0.89–4.23)        | 0.80 (0.11–5.91)  | N/A                     |
|                                             | Mild     | 0.71 (0.16–3.13)        | 1 (Ref.)                | 0.99 (0.07–13.40) | N/A                     |
|                                             | Moderate | N/A                     | N/A                     | 1 (Ref.)          | N/A                     |
|                                             | Heavy    | N/A                     | N/A                     | N/A               | 1 (Ref.)                |
| Current smoker, <20 PY                      | None     | 1 (Ref.)                | 0.90 (0.68–1.20)        | 1.26 (0.77–2.06)  | 1.03 (0.46–2.33)        |
|                                             | Mild     | 0.90 (0.64–1.26)        | 1 (Ref.)                | 0.92 (0.60–1.39)  | 0.89 (0.41–1.91)        |
|                                             | Moderate | 0.52 (0.23–1.16)        | <b>0.60 (0.38–0.95)</b> | 1 (Ref.)          | 0.63 (0.32–1.22)        |
|                                             | Heavy    | 0.41 (0.09–1.79)        | 0.71 (0.32–1.56)        | 1.15 (0.60–2.21)  | 1 (Ref.)                |
| Current smoker, ≥20 PY                      | None     | 1 (Ref.)                | 0.85 (0.43–1.69)        | 0.28 (0.04–2.03)  | N/A                     |
|                                             | Mild     | 1.25 (0.51–3.07)        | 1 (Ref.)                | 0.53 (0.12–2.44)  | N/A                     |
|                                             | Moderate | 0.93 (0.09–9.37)        | 1.90 (0.45–8.04)        | 1 (Ref.)          | 1.28 (0.25–6.58)        |
|                                             | Heavy    | 0.56 (0.07–4.87)        | 0.32 (0.04–2.55)        | 0.67 (0.20–2.20)  | 1 (Ref.)                |
| <b>All cancers (except thyroid cancers)</b> |          |                         |                         |                   |                         |
| Never smoker                                | None     | 1 (Ref.)                | 1.01 (0.98–1.04)        | 0.96 (0.84–1.10)  | 1.13 (0.90–1.42)        |
|                                             | Mild     | 1.02 (0.98–1.06)        | 1 (Ref.)                | 1.03 (0.93–1.13)  | 1.04 (0.84–1.27)        |
|                                             | Moderate | 0.99 (0.83–1.18)        | 1.00 (0.85–1.16)        | 1 (Ref.)          | 0.94 (0.71–1.24)        |
|                                             | Heavy    | 0.99 (0.72–1.37)        | 1.11 (0.82–1.50)        | 1.10 (0.79–1.53)  | 1 (Ref.)                |
| Former smoker, <20 PY                       | None     | 1 (Ref.)                | 0.93 (0.72–1.21)        | 0.93 (0.48–1.81)  | 0.26 (0.04–1.84)        |
|                                             | Mild     | <b>0.67 (0.47–0.96)</b> | 1 (Ref.)                | 1.16 (0.77–1.75)  | 0.79 (0.32–1.92)        |
|                                             | Moderate | 1.45 (0.62–3.42)        | 1.08 (0.56–2.07)        | 1 (Ref.)          | 0.68 (0.22–2.07)        |
|                                             | Heavy    | 2.13 (0.74–6.15)        | 0.92 (0.34–2.49)        | 1.25 (0.50–3.13)  | 1 (Ref.)                |
| Former smoker, ≥20 PY                       | None     | 1 (Ref.)                | 1.59 (0.90–2.82)        | 0.41 (0.06–2.97)  | 0.63 (0.09–4.62)        |
|                                             | Mild     | 1.12 (0.39–3.27)        | 1 (Ref.)                | 1.63 (0.30–8.93)  | N/A                     |
|                                             | Moderate | N/A                     | N/A                     | 1 (Ref.)          | N/A                     |
|                                             | Heavy    | N/A                     | N/A                     | N/A               | 1 (Ref.)                |
| Current smoker, <20 PY                      | None     | 1 (Ref.)                | <b>0.82 (0.68–0.99)</b> | 1.18 (0.84–1.66)  | 0.72 (0.37–1.39)        |
|                                             | Mild     | 0.83 (0.66–1.05)        | 1 (Ref.)                | 1.02 (0.78–1.35)  | 0.92 (0.55–1.55)        |
|                                             | Moderate | 0.81 (0.47–1.40)        | 0.80 (0.57–1.13)        | 1 (Ref.)          | 0.82 (0.50–1.33)        |
|                                             | Heavy    | 0.58 (0.24–1.41)        | 0.63 (0.35–1.14)        | 0.93 (0.56–1.55)  | 1 (Ref.)                |
| Current smoker, ≥20 PY                      | None     | 1 (Ref.)                | 0.84 (0.54–1.29)        | 0.60 (0.25–1.46)  | 0.90 (0.37–2.21)        |
|                                             | Mild     | 1.35 (0.78–2.32)        | 1 (Ref.)                | 0.92 (0.39–2.15)  | 0.42 (0.10–1.76)        |
|                                             | Moderate | 1.92 (0.50–7.39)        | 2.84 (0.99–8.14)        | 1 (Ref.)          | 2.31 (0.76–7.03)        |
|                                             | Heavy    | 0.20 (0.03–1.54)        | 0.44 (0.13–1.53)        | 0.71 (0.30–1.67)  | 1 (Ref.)                |
| <b>Death</b>                                |          |                         |                         |                   |                         |
| Never                                       | None     | 1 (Ref.)                | 1.06 (1.00–1.13)        | 1.03 (0.80–1.33)  | <b>1.53 (1.03–2.26)</b> |

|                        |          |                         |                  |                            |                         |
|------------------------|----------|-------------------------|------------------|----------------------------|-------------------------|
| smoker                 | Mild     | 1.09 (1.00–1.18)        | 1 (Ref.)         | 1.00 (0.80–1.26)           | <b>1.49 (1.04–2.15)</b> |
|                        | Moderate | 1.11 (0.80–1.54)        | 0.83 (0.60–1.15) | 1 (Ref.)                   | 1.11 (0.66–1.85)        |
|                        | Heavy    | 0.93 (0.55–1.57)        | 0.86 (0.51–1.46) | 1.11 (0.63–1.95)           | 1 (Ref.)                |
| Former smoker, <20 PY  | None     | 1 (Ref.)                | 1.01 (0.68–1.49) | 0.44 (0.06–3.15)           | 0.89 (0.13–6.39)        |
|                        | Mild     | 1.30 (0.76–2.21)        | 1 (Ref.)         | 1.25 (0.52–2.98)           | N/A                     |
|                        | Moderate | 1.64 (0.39–6.86)        | 1.19 (0.37–3.85) | 1 (Ref.)                   | 1.07 (0.19–5.96)        |
|                        | Heavy    | 2.26 (0.33–15.61)       | 0.22 (0.02–2.35) | 0.19 (0.01–2.75)           | 1 (Ref.)                |
| Former smoker, ≥20 PY  | None     | 1 (Ref.)                | 1.37 (0.72–2.61) | 0.68 (0.09–4.96)           | 1.04 (0.14–7.57)        |
|                        | Mild     | 2.78 (0.55–13.99)       | 1 (Ref.)         | <b>12.53 (1.25–125.92)</b> | N/A                     |
|                        | Moderate | N/A                     | N/A              | 1 (Ref.)                   | N/A                     |
|                        | Heavy    | N/A                     | N/A              | N/A                        | 1 (Ref.)                |
| Current smoker, <20 PY | None     | 1 (Ref.)                | 0.87 (0.68–1.12) | 1.20 (0.71–2.05)           | 1.08 (0.40–2.90)        |
|                        | Mild     | 1.05 (0.75–1.46)        | 1 (Ref.)         | 1.12 (0.69–1.80)           | 0.60 (0.19–1.90)        |
|                        | Moderate | <b>2.40 (1.14–5.06)</b> | 1.27 (0.67–2.43) | 1 (Ref.)                   | <b>3.86 (1.98–7.54)</b> |
|                        | Heavy    | 0.78 (0.25–2.43)        | 0.30 (0.10–0.92) | 1.13 (0.56–2.27)           | 1 (Ref.)                |
| Current smoker, ≥20 PY | None     | 1 (Ref.)                | 1.17 (0.79–1.74) | 0.60 (0.19–1.88)           | 1.08 (0.34–3.40)        |
|                        | Mild     | 0.91 (0.51–1.62)        | 1 (Ref.)         | 0.81 (0.28–2.37)           | 1.34 (0.50–3.59)        |
|                        | Moderate | 0.80 (0.08–8.33)        | 1.70 (0.35–8.20) | 1 (Ref.)                   | 1.78 (0.32–9.87)        |
|                        | Heavy    | 1.19 (0.11–13.13)       | 0.82 (0.13–5.04) | 0.47 (0.09–2.55)           | 1 (Ref.)                |

PY, pack-years

\*Adjusted for age, socioeconomic position (income level and place of residence), smoking status, comorbidities (hypertension, diabetes, dyslipidemia, chronic kidney disease, and chronic obstructive pulmonary disease), and Charlson comorbidity index



**eTable 9.** Associations Between Changes in Drinking Level and Cancer (Sustained Non-Drinker as a Referent)

| Alcohol consumption status                  |          | aHR (95% CI)*           |
|---------------------------------------------|----------|-------------------------|
| 2009                                        | 2011     |                         |
| <b>Alcohol-related cancers</b>              |          |                         |
| None                                        | None     | 1 (Ref.)                |
|                                             | Mild     | <b>1.11 (1.07–1.14)</b> |
|                                             | Moderate | <b>1.19 (1.11–1.28)</b> |
|                                             | Heavy    | <b>1.44 (1.32–1.56)</b> |
| Mild                                        | None     | <b>1.11 (1.08–1.14)</b> |
|                                             | Mild     | <b>1.07 (1.04–1.09)</b> |
|                                             | Moderate | <b>1.15 (1.10–1.20)</b> |
|                                             | Heavy    | <b>1.24 (1.16–1.33)</b> |
| Moderate                                    | None     | <b>1.35 (1.27–1.44)</b> |
|                                             | Mild     | <b>1.16 (1.11–1.20)</b> |
|                                             | Moderate | <b>1.13 (1.09–1.18)</b> |
|                                             | Heavy    | <b>1.22 (1.16–1.29)</b> |
| Heavy                                       | None     | <b>1.68 (1.56–1.80)</b> |
|                                             | Mild     | <b>1.34 (1.26–1.42)</b> |
|                                             | Moderate | <b>1.26 (1.20–1.33)</b> |
|                                             | Heavy    | <b>1.41 (1.36–1.47)</b> |
| <b>All cancers (except thyroid cancers)</b> |          |                         |
| None                                        | None     | 1 (Ref.)                |
|                                             | Mild     | <b>0.96 (0.93–0.99)</b> |
|                                             | Moderate | <b>1.10 (1.05–1.15)</b> |
|                                             | Heavy    | <b>1.17 (1.09–1.25)</b> |
| Mild                                        | None     | 1.05 (0.98–1.14)        |
|                                             | Mild     | 0.98 (0.93–1.03)        |
|                                             | Moderate | 1.05 (0.98–1.12)        |
|                                             | Heavy    | 1.05 (0.98–1.14)        |
| Moderate                                    | None     | 0.98 (0.93–1.04)        |
|                                             | Mild     | 1.04 (0.98–1.11)        |
|                                             | Moderate | 1.03 (0.95–1.12)        |
|                                             | Heavy    | 0.91 (0.85–0.97)        |
| Heavy                                       | None     | <b>0.91 (0.86–0.96)</b> |
|                                             | Mild     | 1.04 (0.96–1.12)        |
|                                             | Moderate | <b>0.92 (0.86–0.98)</b> |
|                                             | Heavy    | <b>0.91 (0.86–0.97)</b> |

aHR, adjusted hazard ratio; CI, confidence interval

\*adjusted for age, sex, socioeconomic position (income level and place of residence), smoking status, physical activity, comorbidities (hypertension, diabetes, dyslipidemia, chronic kidney disease, and chronic obstructive pulmonary disease), and Charlson comorbidity index

**eFigure 1. Flow Chart of the Study Population**

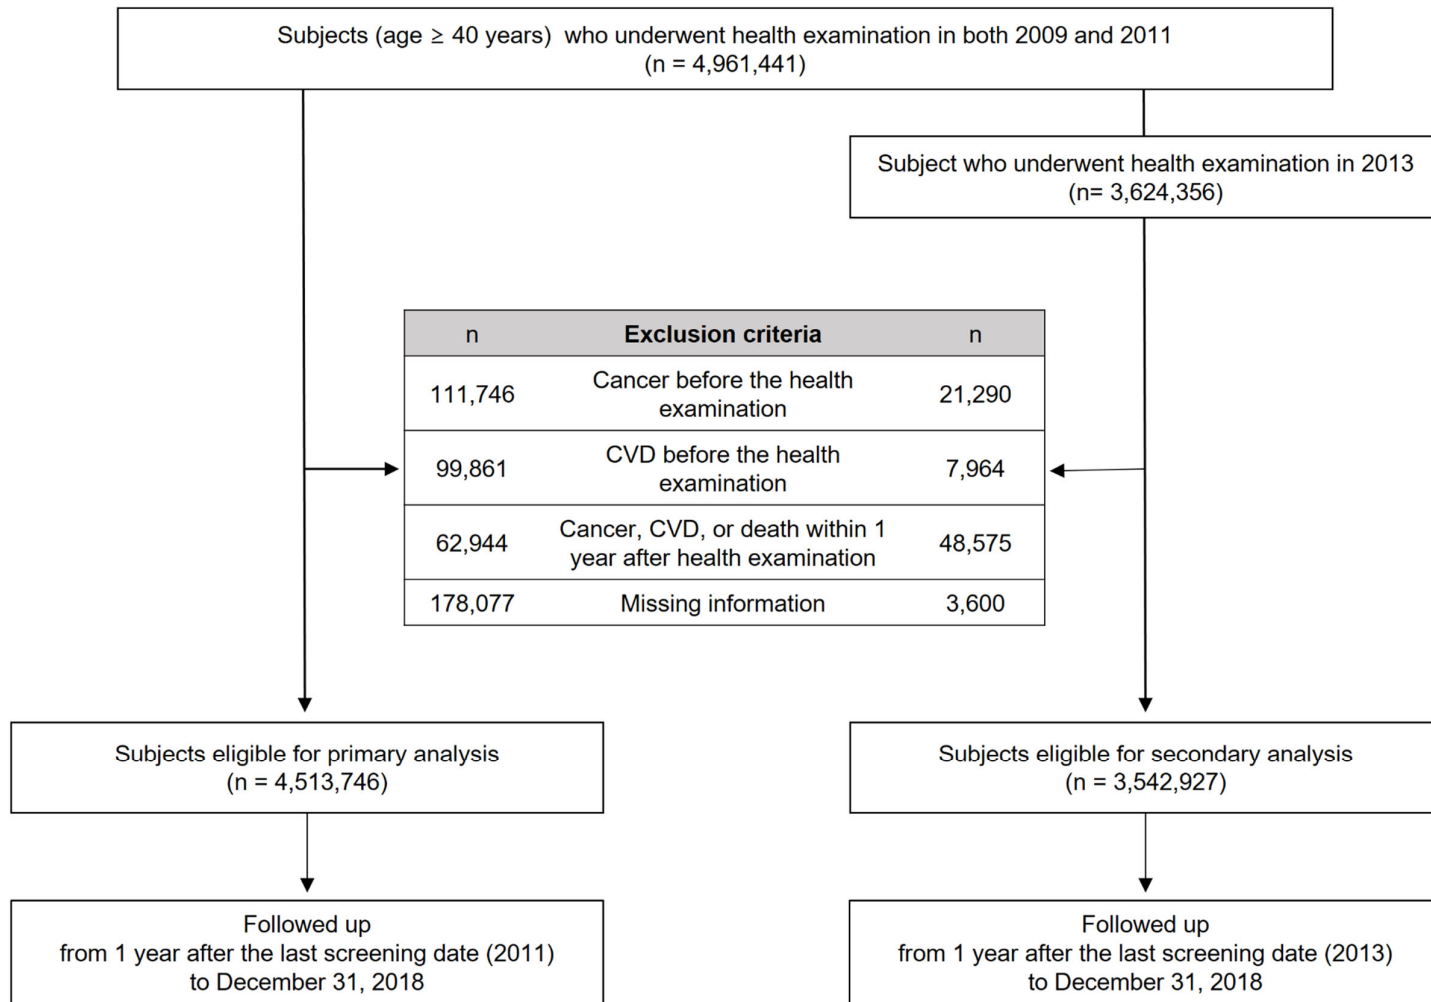

**eFigure 2.** The Risk of Site-Specific Cancer According to Changes in Drinking Level Between 2009 and 2011

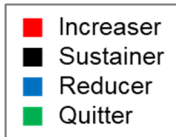

**A. Lip, oral cavity and pharynx**

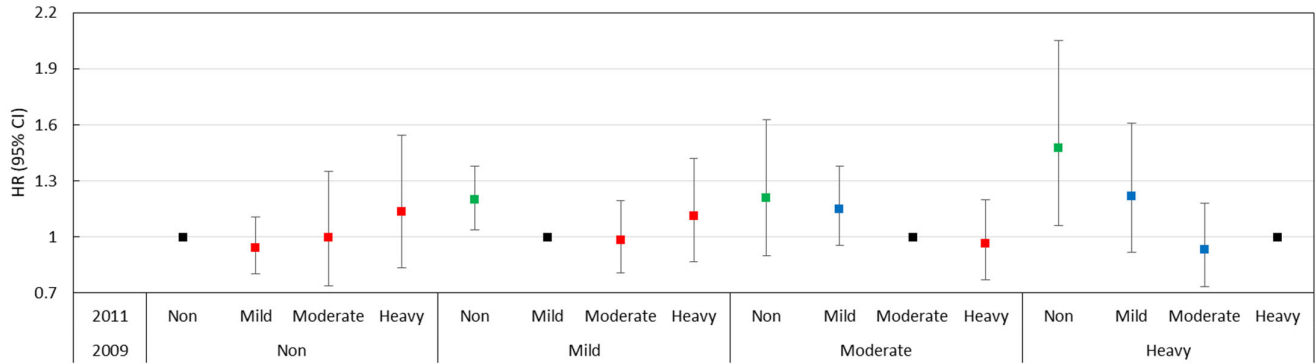

**B. Esophagus**

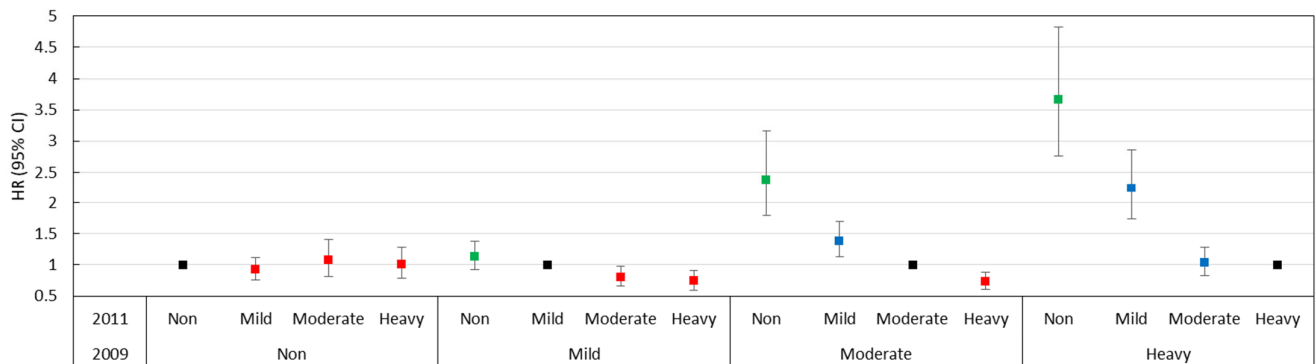

**C. Stomach**

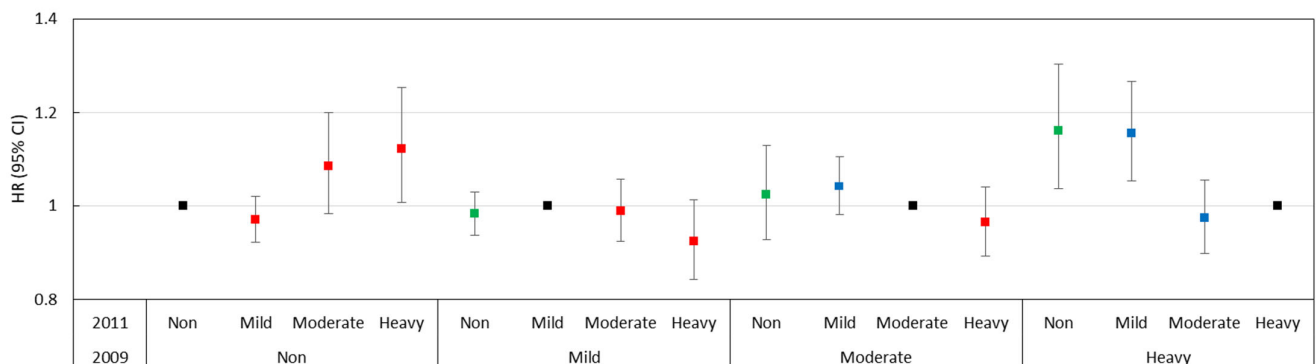

### D. Colorectum

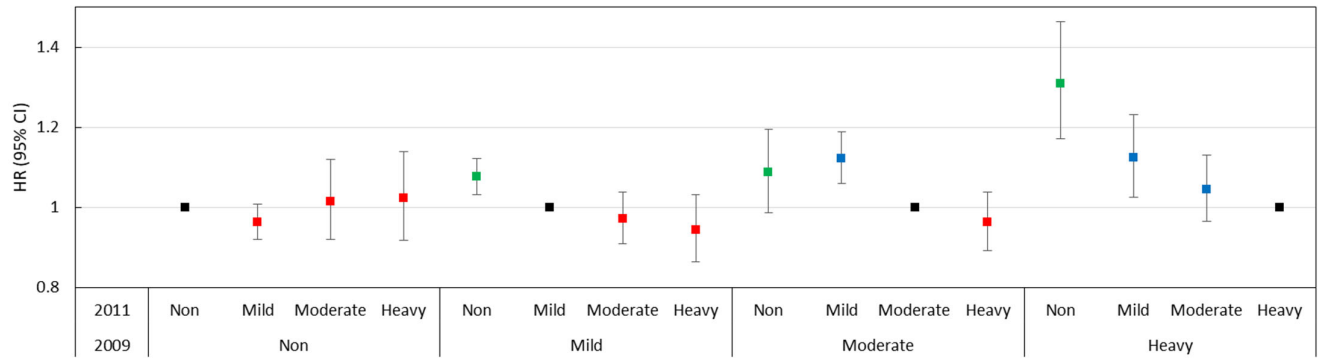

### E. Liver

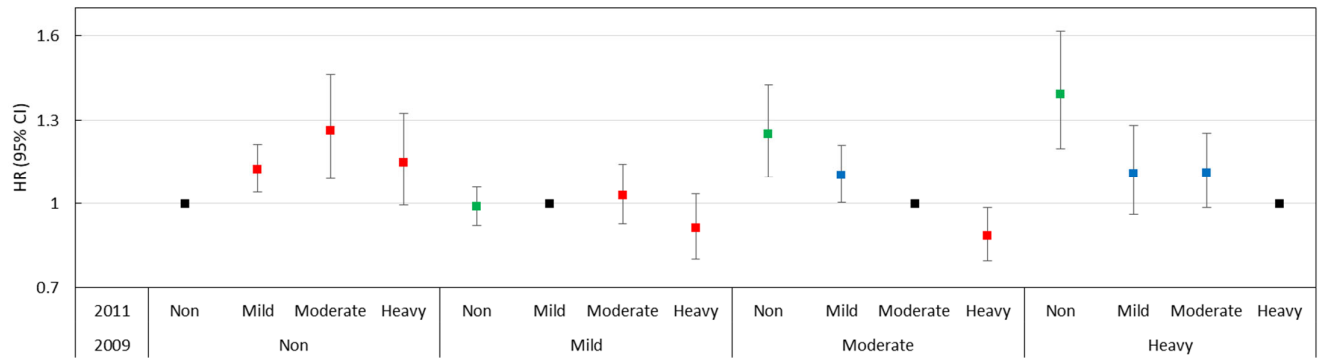

### F. Gallbladder

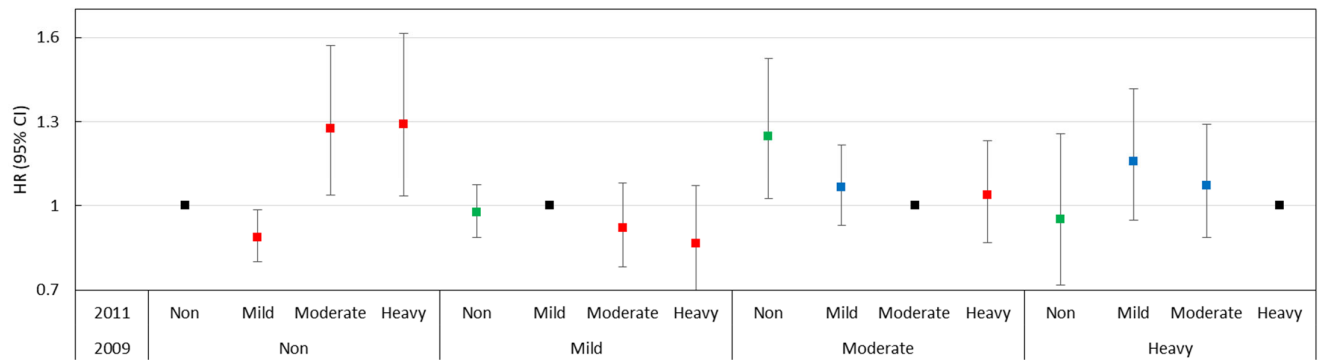

### G. Pancreas

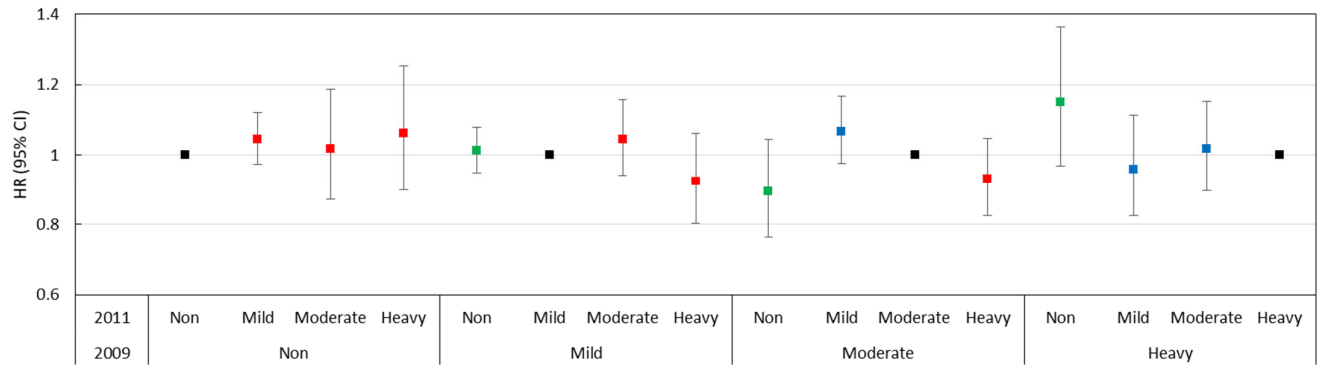

### H. Larynx

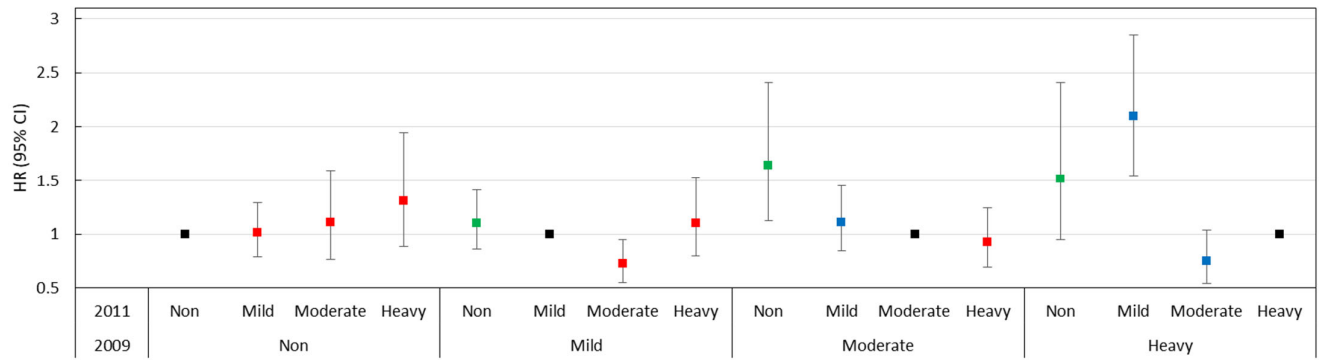

### I. Lung

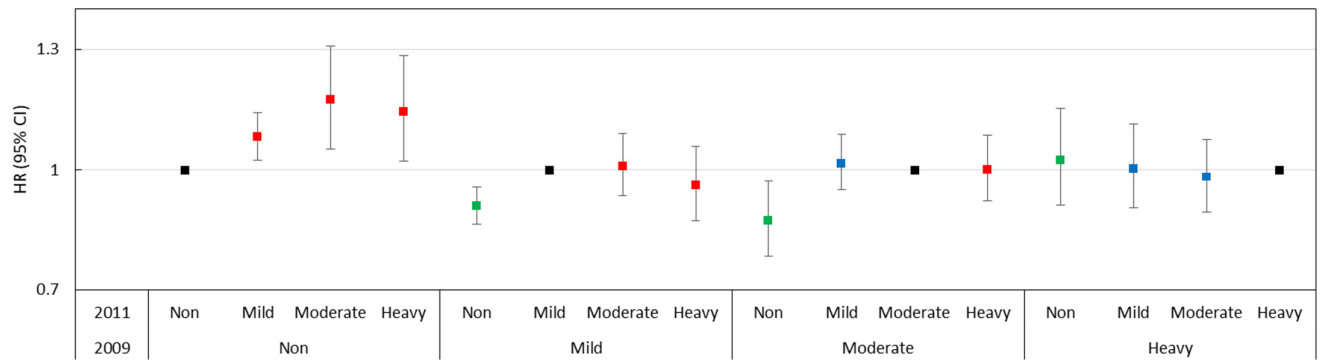

### J. Breast

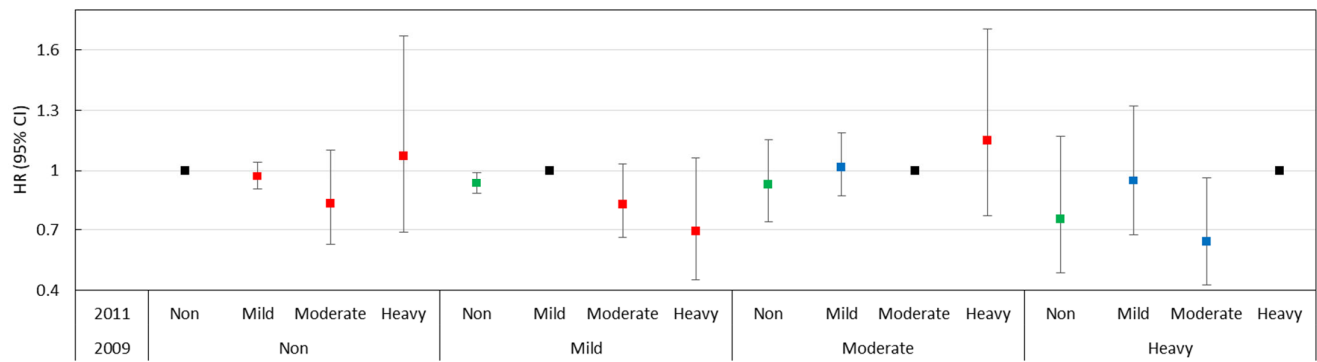

**K. Cervix uteri**

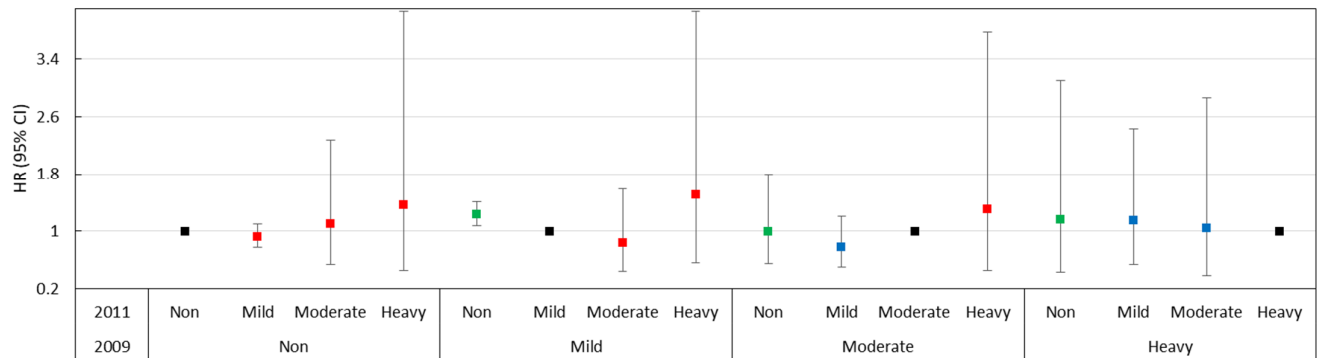

**L. Corpus uteri**

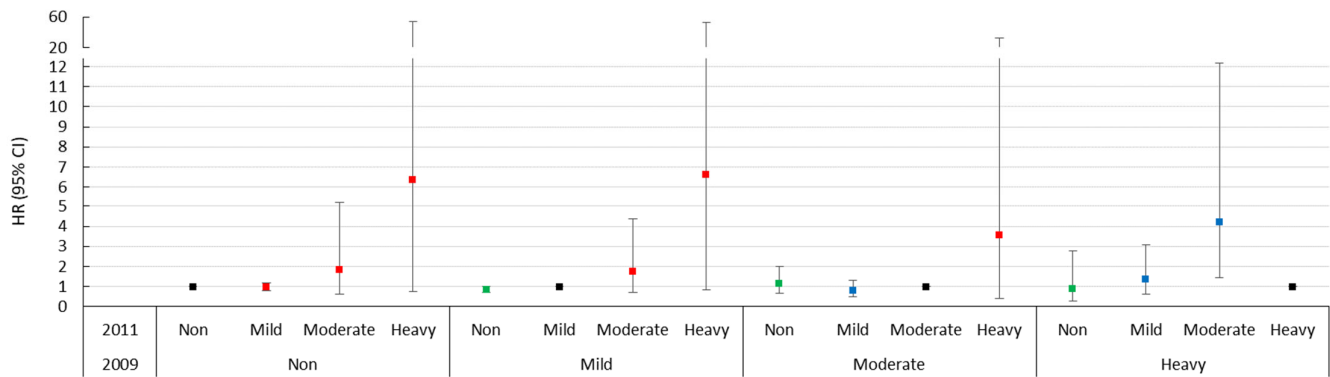

**M. Ovary**

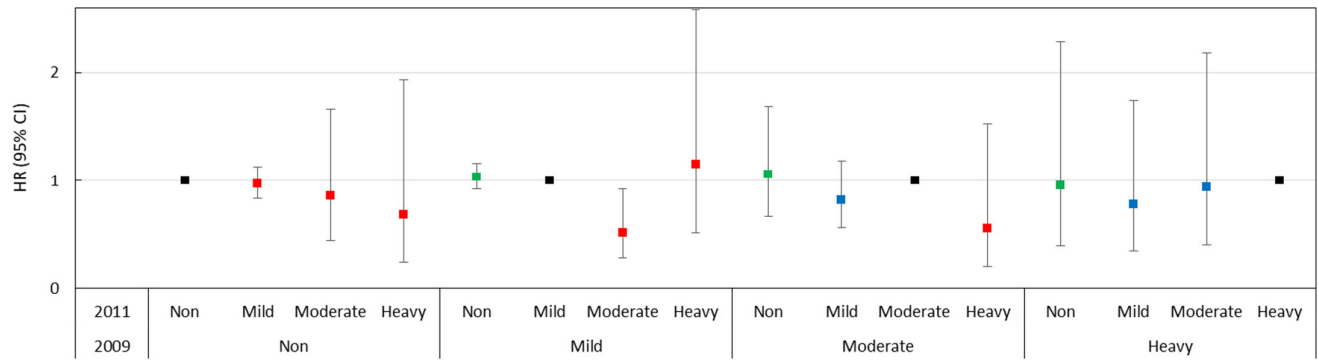

**N. Prostate**

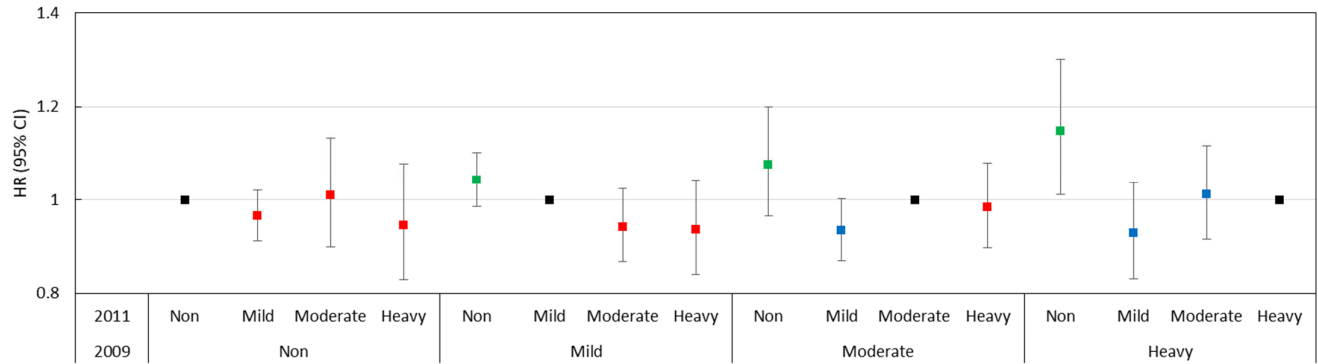

**O. Kidney**

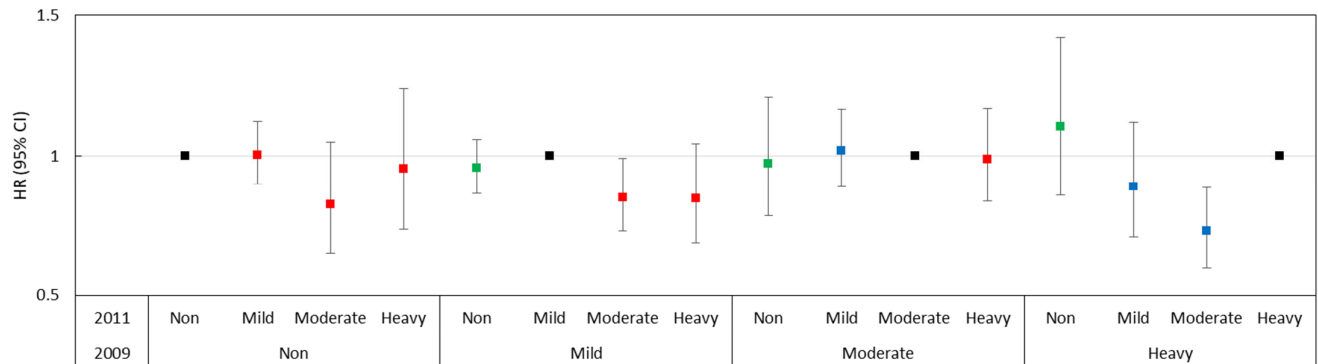

**P. Bladder**

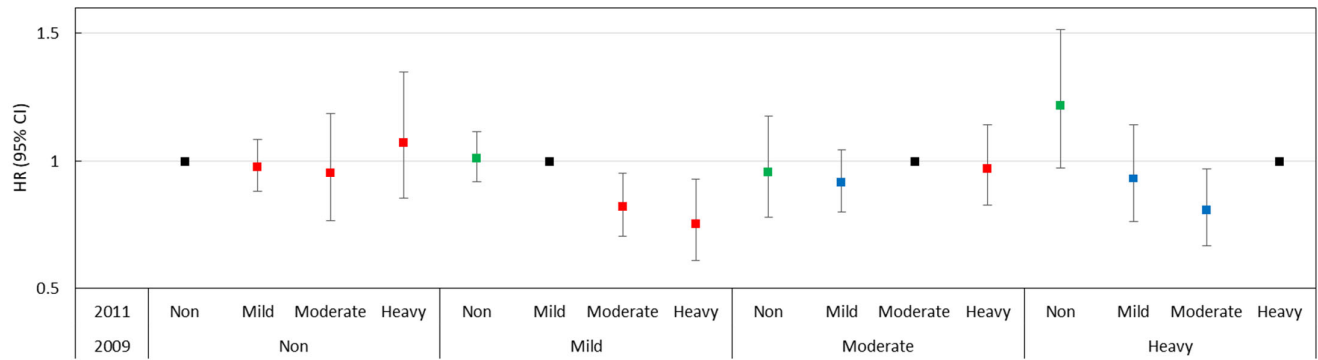

**Q. Brain and CNS**

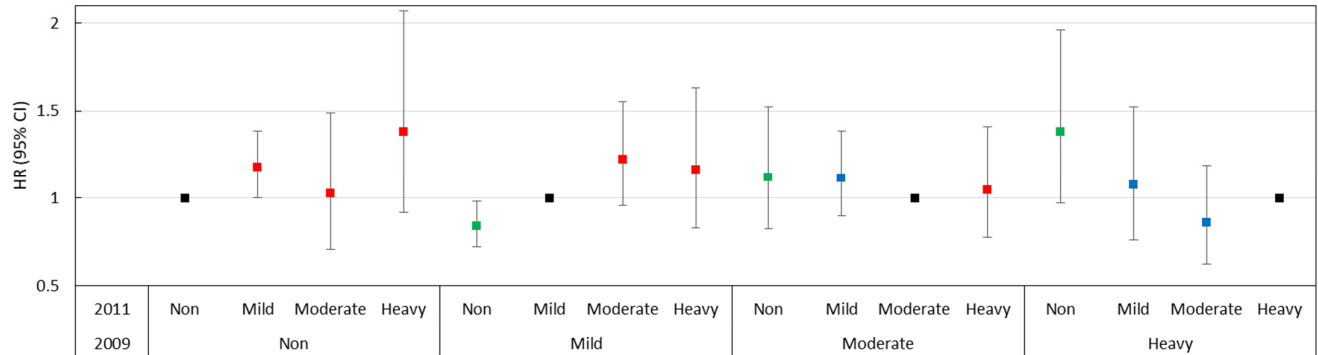

**R. Hodgkin lymphoma**

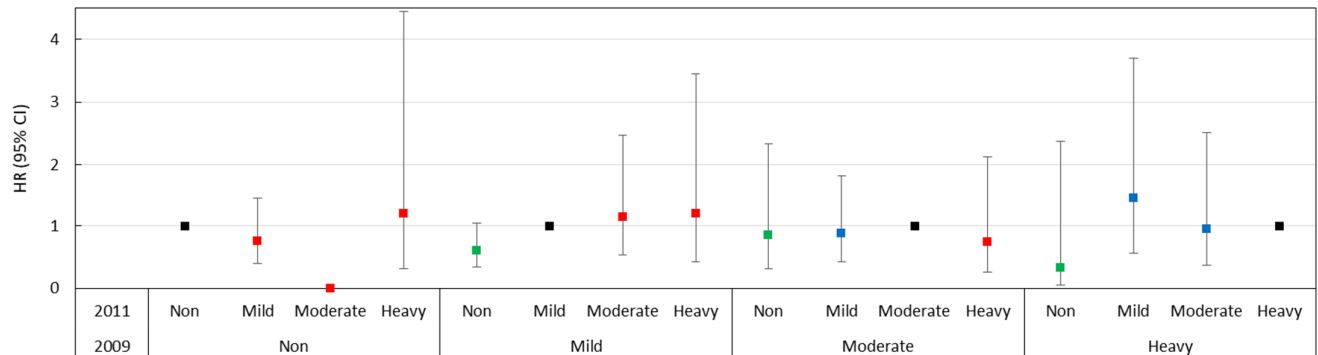

**S. Non-Hodgkin lymphoma**

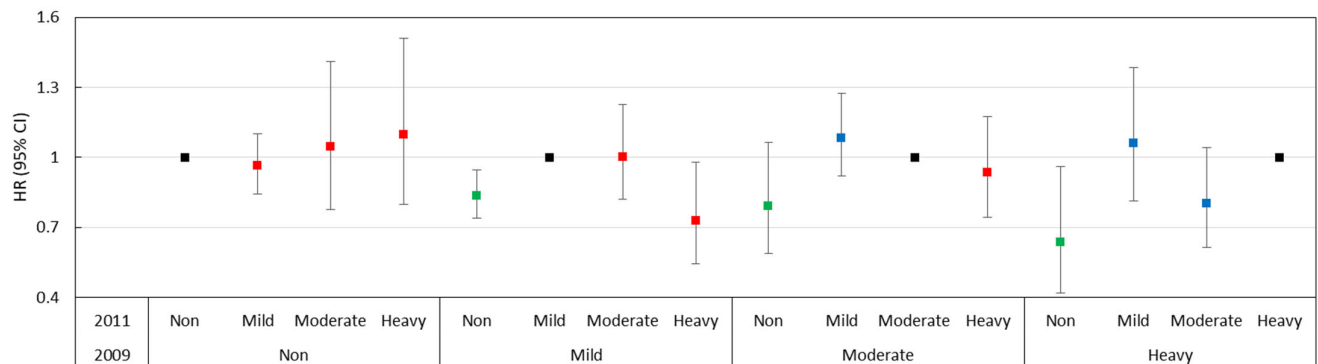



### T. Multiple myeloma

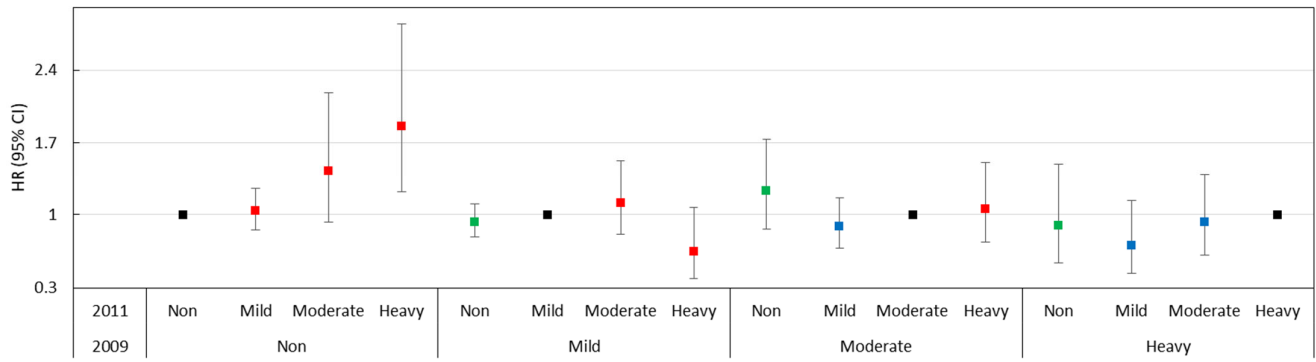

### U. Leukemia

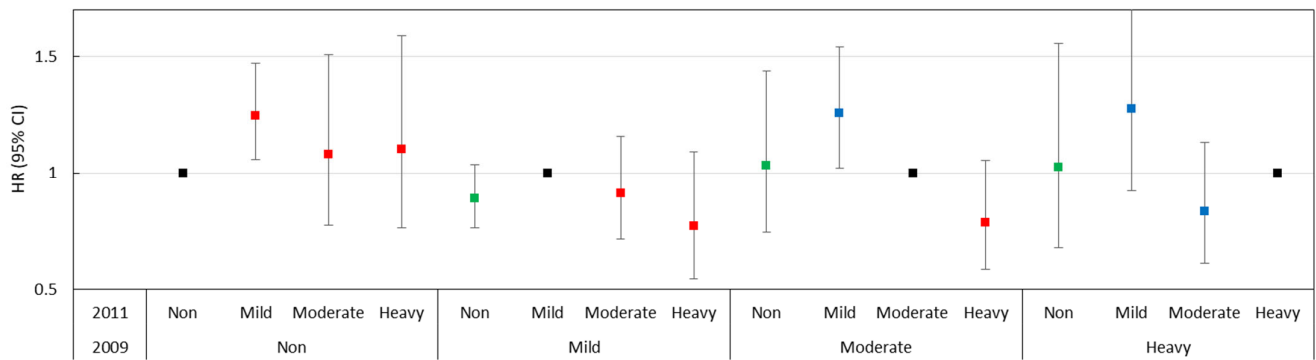

HRs are adjusted for age, sex, socioeconomic position (income level and place of residence), smoking status, physical activity, comorbidities (hypertension, diabetes, dyslipidemia, chronic kidney disease, and chronic obstructive pulmonary disease), and Charlson comorbidity index
